# Supplementary material
Source: Research Square preprint supplement (doi:10.21203/rs.3.rs-8948376/v1)
Supplement: Supplementary file 1 [file 1e58307b44b39975eb12ea2c.xlsx]

## Sheet: Table S1
Gene	HR	CI lower	CI upper	P value	Risk type
AX746755	0.578692	0.47775	0.700962	0.00000002232574	Protective
GREB1	0.710703	0.629921	0.801845	0.00000002902592	Protective
MRPL47	3.09255	2.04263	4.68211	0.00000009544793	Risk
IL8	1.29439	1.16819	1.43423	0.00000082256234	Risk
HSPA6	1.53418	1.29248	1.82109	0.00000099230443	Risk
NDUFB5	3.68416	2.17815	6.23143	0.00000115564107	Risk
RRAGD	1.81488	1.42484	2.31168	0.00000137894651	Risk
VSIG4	1.67139	1.35676	2.059	0.00000138515307	Risk
PKM	2.6153	1.76982	3.8647	0.00000139851693	Risk
CD22	0.579893	0.464021	0.7247	0.00000165860769	Protective
C5AR1	1.65252	1.33849	2.04022	0.00000299435107	Risk
TREM1	1.425	1.22807	1.65351	0.00000305195742	Risk
NXPH4	1.32042	1.17469	1.48422	0.00000318728664	Risk
UPP1	1.75948	1.38631	2.23309	0.00000338780008	Risk
FCGR2A	2.01665	1.49344	2.72316	0.00000471255264	Risk
ACTL6A	2.59875	1.72469	3.91578	0.00000498067247	Risk
FCGR1A	1.70816	1.35726	2.14978	0.00000502919343	Risk
SPP1	1.3579	1.18998	1.54952	0.00000555622985	Risk
VAV3	0.741131	0.650686	0.844147	0.00000643876776	Protective
ZNF516	0.608612	0.490074	0.755821	0.00000702588789	Protective
MALSU1	3.19448	1.92177	5.31008	0.00000748482704	Risk
SLC35E2B	0.503659	0.372774	0.680498	0.00000792994804	Protective
FAIM3	0.664728	0.555083	0.79603	0.00000898329993	Protective
LRIG2	0.346738	0.216895	0.55431	0.00000964835353	Protective
CNTN4	0.702206	0.60029	0.821426	0.00000993320466	Protective
SLC11A1	1.48137	1.24418	1.76378	0.00001014426513	Risk
ENO1	2.05552	1.49137	2.83309	1.07425e-05	Risk
SEMA3C	0.694706	0.590516	0.817279	0.00001114065994	Protective
GPR84	1.5316	1.26569	1.85337	0.00001178159239	Risk
AQP5	1.18177	1.09652	1.27366	0.00001232437839	Risk
CD14	1.73693	1.35593	2.22499	0.00001243186749	Risk
RAB37	0.547453	0.417749	0.717428	0.00001259302183	Protective
NRIP1	0.562868	0.434663	0.728888	0.00001313114251	Protective
ERO1L	1.81438	1.38786	2.37198	0.00001317435245	Risk
CCL19	0.814769	0.742626	0.89392	0.00001486810095	Protective
GPI	2.28413	1.56912	3.32495	0.00001620328938	Risk
CD1C	0.724213	0.625317	0.838749	1.65276e-05	Protective
FAM193A	0.269236	0.148004	0.489771	0.00001722278743	Protective
FCGR3A	1.646	1.3109	2.06675	0.00001779691203	Risk
B3GNT7	1.45449	1.22569	1.726	0.00001783265161	Risk
KIAA1551	0.475152	0.337695	0.66856	0.00001947441848	Protective
PGK1	2.0608	1.4786	2.87224	0.00001965336387	Risk
ZDHHC17	0.400661	0.263159	0.610008	0.00002002405227	Protective
PSMG3	2.63526	1.68782	4.11452	0.00002020579126	Risk
PARD3B	0.561124	0.430055	0.73214	0.00002071656116	Protective
GMPS	2.29783	1.5651	3.37362	0.00002174201067	Risk
SHMT2	2.21196	1.53289	3.19185	0.00002206224886	Risk
ADAMTS15	0.789995	0.707859	0.881661	0.00002569964407	Protective
PVR	1.83363	1.38096	2.43468	0.00002772907955	Risk
AK125301	0.463014	0.322972	0.66378	0.00002790948932	Protective
FSIP1	0.779415	0.693502	0.87597	2.88556e-05	Protective
P4HA1	1.98523	1.43858	2.73961	3.00737e-05	Risk
ADD1	0.296973	0.167265	0.527266	0.00003394797001	Protective
ABCB1	0.647004	0.52657	0.794983	0.00003424649377	Protective
AFF3	0.813106	0.736594	0.897567	0.00004074361923	Protective
CLIC1	3.79415	2.00309	7.18669	0.00004285665796	Risk
EGLN3	1.43032	1.20481	1.69804	0.00004344399576	Risk
CROCC	0.447048	0.303741	0.657969	0.00004450787653	Protective
GARS	2.251	1.52375	3.32535	0.00004591085248	Risk
NDRG1	1.49775	1.23271	1.81977	0.00004791039534	Risk
TMEM214	3.67252	1.95577	6.89621	5.19882e-05	Risk
SERPINA5	0.835091	0.765223	0.911339	0.00005287263814	Protective
AREG	0.815338	0.738145	0.900603	0.00005747056911	Protective
ADHFE1	0.633487	0.507071	0.791418	0.00005824968196	Protective
ZNF75D	0.386649	0.243049	0.615091	0.00006028881007	Protective
YWHAH	3.24083	1.82435	5.7571	0.00006053494106	Risk
LURAP1L	0.69887	0.586564	0.83268	0.00006109321419	Protective
TCF7	0.653747	0.531053	0.804787	0.00006128767421	Protective
FLT3	0.731897	0.628049	0.852917	0.00006396572023	Protective
CTDSP1	0.355926	0.214373	0.590947	0.00006511154978	Protective
PREX1	0.653203	0.529928	0.805154	0.00006581969789	Protective
MYO10	1.65724	1.29253	2.12487	0.00006794054804	Risk
NBPF8	0.536128	0.394418	0.728752	0.00006881953905	Protective
CR936688	0.510353	0.366449	0.710769	0.00006889509249	Protective
CDON	0.664611	0.543222	0.813126	7.17786e-05	Protective
PDE5A	0.640499	0.51395	0.798209	0.00007284564845	Protective
COPG1	2.8378	1.69439	4.75283	0.00007368747564	Risk
LINC01094	1.9218	1.38981	2.65742	0.00007794505789	Risk
PTGER3	0.766601	0.671781	0.874804	7.96401e-05	Protective
BBS10	0.45399	0.306545	0.672354	0.00008107747564	Protective
NAT1	0.825904	0.750798	0.908524	0.00008420862581	Protective
SLC7A2	0.827068	0.752135	0.909466	0.00008913771828	Protective
POMP	2.66446	1.63074	4.35345	0.00009145796195	Risk
S100PBP	0.323523	0.183729	0.569684	9.26537e-05	Protective
NSFL1C	3.13609	1.76629	5.56821	0.00009535032277	Risk
ZNF721	0.438149	0.289434	0.663277	9.59215e-05	Protective
IGHD	0.786669	0.697024	0.887844	0.00010146625553	Protective
NOP14-AS1	0.44228	0.292775	0.66813	0.00010623076852	Protective
AGR3	0.880412	0.825395	0.939096	0.00010945854238	Protective
FCER1A	0.777245	0.684056	0.883129	0.00011006690513	Protective
VEGFA	1.62121	1.26908	2.07103	0.00011007550807	Risk
STRIP1	0.308399	0.169839	0.560002	0.000111104	Protective
SNRPB	2.25637	1.49326	3.40946	0.00011167351974	Risk
ELOVL2	0.82351	0.746151	0.908888	0.00011428105087	Protective
MAP1LC3A	0.586159	0.446652	0.769239	0.00011728035931	Protective
ANKRD29	0.674973	0.552508	0.824582	0.00011898936976	Protective
ST6GALNAC5	1.29282	1.13429	1.47351	0.00011916100341	Risk
C2	1.49356	1.21744	1.8323	0.00011982728265	Risk
RPN1	2.66082	1.61598	4.38122	0.00011994108548	Risk
TK1	1.46858	1.20736	1.78631	0.00012021715158	Risk
LYPD6B	0.81117	0.728953	0.90266	0.00012396562105	Protective
TP63	0.781439	0.688854	0.886467	0.00012661888367	Protective
UFD1L	2.63819	1.60236	4.34364	0.00013715475381	Risk
TARS	2.3185	1.50468	3.57248	0.00013771518169	Risk
IRS1	0.683569	0.562031	0.831389	0.000139714	Protective
F2RL2	0.778909	0.684897	0.885825	0.00014048280844	Protective
HIAT1	0.304007	0.164634	0.561369	0.00014177432479	Protective
N4BP2L1	0.56464	0.420597	0.758013	0.00014252539769	Protective
MARCO	1.21089	1.09695	1.33666	0.00014757031323	Risk
MDH2	2.89107	1.67064	5.00304	0.00014818324622	Risk
USB1	2.17357	1.45503	3.24694	0.00014978980398	Risk
TMEM208	2.20206	1.46378	3.31269	0.00015145093855	Risk
BTG2	0.684947	0.56285	0.833531	0.00015826571035	Protective
GOT1	2.13225	1.43934	3.15873	0.00015919042816	Risk
NDUFA4L2	1.44327	1.19259	1.74664	0.00016368356199	Risk
FNDC3B	1.92002	1.36744	2.6959	0.00016510631237	Risk
SLC6A8	1.66614	1.27703	2.17382	0.00016859488563	Risk
AMIGO2	0.714741	0.599792	0.851719	0.00017399	Protective
MFN1	2.76603	1.62594	4.70554	0.00017470686707	Risk
PLA2G15	2.21765	1.46288	3.36184	0.00017537620079	Risk
SYDE2	0.672027	0.545866	0.827345	0.00017927199189	Protective
ELF2	0.330015	0.1847	0.589661	0.00018136403436	Protective
TFF1	0.885485	0.830803	0.943767	0.00018436541584	Protective
SYNPO2	0.702569	0.583846	0.845434	0.00018564058012	Protective
USP40	0.402111	0.249289	0.648619	0.00018800674897	Protective
VILL	0.585378	0.441854	0.775522	0.000190438	Protective
CIRH1A	2.16903	1.44423	3.25758	0.00019045324398	Risk
PTGES	0.71076	0.593998	0.850473	0.000192361	Protective
GRPR	0.836973	0.76208	0.919227	0.00019851433141	Protective
SLC45A4	1.77312	1.31114	2.39788	0.00020004775789	Risk
VMO1	1.49345	1.20887	1.84503	0.00020039346861	Risk
TPI1	1.87959	1.34735	2.62208	0.00020303230522	Risk
LDHA	1.91549	1.35921	2.69944	0.00020459007602	Risk
CENPN	1.64877	1.26586	2.14749	0.00020855497087	Risk
TNFRSF21	1.47974	1.2029	1.82029	0.00020885064232	Risk
TMED9	2.05729	1.40393	3.01472	0.000215458	Risk
ANKMY1	0.533505	0.382336	0.744445	0.00021896921742	Protective
INTS1	2.92852	1.65462	5.18318	0.00022538572157	Risk
RFC2	2.36964	1.4977	3.74921	0.00022824374373	Risk
CHAD	0.845305	0.773028	0.92434	0.00022858343908	Protective
CDCP1	1.81434	1.32024	2.49336	0.00023995382653	Risk
BCAR1	2.29791	1.47369	3.58309	0.00024175054255	Risk
ZRANB2-AS1	0.772393	0.672869	0.886636	0.00024296891722	Protective
PSMD7	2.22681	1.45196	3.41517	0.000243453	Risk
ADM	1.32499	1.14003	1.53995	0.00024400859856	Risk
DET1	0.43645	0.280211	0.679804	0.00024538829933	Protective
SUSD3	0.817371	0.733831	0.910421	0.00024634280162	Protective
GIGYF2	0.338634	0.189735	0.604385	0.00024865194887	Protective
BNIP3	1.70529	1.28148	2.26928	0.00025100124263	Risk
ATP7B	0.711718	0.593244	0.853852	0.00025149187615	Protective
GALNT14	1.29156	1.12575	1.48179	0.00026259593875	Risk
NXNL2	0.812412	0.726613	0.908343	0.00026419054083	Protective
LOXL3	2.00165	1.37863	2.90622	0.00026459106865	Risk
SEC61A1	2.77735	1.60322	4.81138	0.00026887164371	Risk
VARS	2.3934	1.49617	3.82869	0.00027173904575	Risk
CALR	2.11505	1.41283	3.1663	0.00027401763579	Risk
SEC61G	1.96777	1.36527	2.83615	0.00028413029237	Risk
MARS	2.63807	1.5623	4.45458	0.00028437080252	Risk
GATA3	0.817538	0.733137	0.911655	0.000290466	Protective
C1QC	1.52397	1.21318	1.91438	0.00029396240321	Risk
POLD1	1.93995	1.35491	2.77761	0.00029623805333	Risk
AF131837	1.2803	1.11984	1.46375	0.00029847870418	Risk
DAD1	2.84147	1.61327	5.00471	0.00029924939386	Risk
MS4A1	0.770301	0.668643	0.887414	0.00030143419717	Protective
ST6GAL1	1.50017	1.20387	1.8694	0.00030307351128	Risk
CYCS	2.00482	1.37432	2.92459	0.00030579262693	Risk
TRPM2	1.58518	1.23432	2.03578	0.00030705814374	Risk
MRPL36	1.92238	1.34756	2.74241	0.00031144519101	Risk
TRAK2	0.458047	0.299556	0.700393	0.00031394175127	Protective
RAD52	0.464962	0.306423	0.705526	0.00031885995458	Protective
GAB1	0.525072	0.369636	0.74587	0.00032175306235	Protective
FLJ00286	0.597297	0.450903	0.79122	0.00032763082951	Protective
ACOT1	0.636224	0.49711	0.814268	0.00032805288202	Protective
CALCOCO1	0.458654	0.299185	0.703122	0.00034913979914	Protective
ITM2A	0.72497	0.607746	0.864804	0.00035144143251	Protective
SNRPC	2.35128	1.47111	3.75805	0.00035245369996	Risk
ZNF589	0.454167	0.294532	0.700322	0.00035415889374	Protective
HAUS7	2.15681	1.41463	3.28837	0.000354386	Risk
RASD2	1.36473	1.15065	1.61863	0.00035439258736	Risk
IL4I1	1.4444	1.18042	1.76741	0.00035598726491	Risk
FRAT1	0.532272	0.376293	0.752907	0.00036522081321	Protective
DNAJB11	2.07678	1.38926	3.10455	0.000367047	Risk
EGOT	0.773631	0.671748	0.890967	0.00036757471732	Protective
C1QB	1.46507	1.18733	1.80778	0.00036933511304	Risk
MAPT-AS1	0.818299	0.732761	0.913823	0.00037122677278	Protective
ZNF787	2.40014	1.48188	3.88739	0.00037284818936	Risk
SETDB2	0.460894	0.300301	0.707368	0.00039419080281	Protective
NRIP2	0.613567	0.468188	0.804088	0.000399613	Protective
POLI	0.558508	0.404273	0.771587	0.00041155926688	Protective
CYP4F22	0.820928	0.735781	0.915929	0.00041277947789	Protective
BLVRA	0.610803	0.464529	0.803135	0.00041618267316	Protective
ZBTB3	0.462421	0.301324	0.709644	0.00041620679463	Protective
LSR	1.73615	1.2774	2.35966	0.000425473	Risk
CLIC6	0.846762	0.771926	0.928854	0.00042630476016	Protective
GFRA1	0.861076	0.79222	0.935918	0.00043580132062	Protective
FRS2	0.562966	0.408688	0.775484	0.00043805764925	Protective
TCEANC2	0.361327	0.204753	0.637634	0.00044345175147	Protective
TMEM229B	0.65699	0.519684	0.830573	0.00044491081864	Protective
Ig alpha 1-[alpha]2m	0.847434	0.772586	0.929533	0.00045013822846	Protective
RFWD3	1.99473	1.35522	2.93601	0.00046312377025	Risk
RUNX1	0.615897	0.469509	0.807927	0.00046478537087	Protective
AK125775	0.486271	0.324696	0.728247	0.00046720041774	Protective
RAPGEF3	0.638361	0.496336	0.821026	0.00047256358544	Protective
UBALD2	1.94041	1.33748	2.81512	0.00048011088558	Risk
MS4A2	0.741795	0.62728	0.877215	0.00048082032592	Protective
SCN7A	0.77296	0.668845	0.893282	0.00048516426729	Protective
CDC42EP1	1.78222	1.28782	2.46642	0.00049059	Risk
TSHZ1	0.533989	0.375245	0.759887	0.00049133300204	Protective
ANO1	0.738624	0.622916	0.875823	0.00049167075417	Protective
PPP1R12B	0.566606	0.411589	0.780006	0.00049502880356	Protective
SIX2	1.26573	1.10838	1.44541	0.00050271042596	Risk
SEPT2	0.345191	0.189372	0.62922	0.00051596726174	Protective
MAPKBP1	0.408921	0.246785	0.677581	0.00051933809851	Protective
TRAF3IP1	0.459775	0.296452	0.713076	0.00051994744133	Protective
GUK1	2.24856	1.42236	3.55467	0.00052481548706	Risk
C3AR1	1.70231	1.26013	2.29966	0.00052700714733	Risk
TTYH3	1.71007	1.26211	2.31702	0.00053610949567	Risk
GATAD2A	2.47386	1.4813	4.13148	0.00053700723549	Risk
TMX1	2.74748	1.55011	4.86975	0.00053827179334	Risk
RAB6B	1.46965	1.18154	1.828	0.00054345050166	Risk
MEAF6	0.44321	0.279155	0.703677	0.000560616	Protective
STK36	0.543867	0.38477	0.768751	0.00056175959979	Protective
IGF1R	0.744928	0.629975	0.880858	0.00057440691624	Protective
EZH1	0.506709	0.344076	0.746213	0.00057682849117	Protective
ACACB	0.701328	0.573037	0.858341	0.00057761429562	Protective
CENPC	0.418273	0.254552	0.687294	0.00058195697847	Protective
PLOD3	1.95898	1.33548	2.87357	0.00058198304478	Risk
AK295639	0.630197	0.484345	0.81997	0.00058636977878	Protective
RSRC1	2.89183	1.57818	5.29892	0.00058902420581	Risk
IGSF10	0.747912	0.633597	0.882852	0.00059865799172	Protective
TSPAN7	0.738946	0.621405	0.87872	0.00062008449526	Protective
ZNF671	0.662173	0.522911	0.838524	0.00062197185321	Protective
DMAP1	0.346238	0.188522	0.635897	0.00062719388388	Protective
ZNF142	0.340397	0.183514	0.631396	0.00062921290637	Protective
MPP7	0.744305	0.628372	0.881627	0.00063007151465	Protective
SYTL4	0.695027	0.564044	0.856428	0.00063866394697	Protective
BID	1.92068	1.32019	2.7943	0.00064451857364	Risk
TTC13	1.82992	1.29271	2.59038	0.00065459669835	Risk
KIF12	0.821997	0.734291	0.920178	0.00066159690831	Protective
PTTG1IP	2.51593	1.47924	4.27915	0.00066205562628	Risk
SIGLEC9	1.55934	1.20743	2.0138	0.00066297991725	Risk
EGR3	0.774091	0.667959	0.897087	0.00066545448483	Protective
UST	0.684874	0.550661	0.851798	0.00067052862946	Protective
CLEC5A	1.37823	1.14541	1.65836	0.00067858637191	Risk
MSR1	1.57046	1.21044	2.03756	0.00067988775857	Risk
CPA3	0.802882	0.707248	0.911448	0.00069164142953	Protective
AL137454	0.818359	0.728775	0.918955	0.000702037	Protective
RIMS4	0.828803	0.743503	0.923889	0.00070261973621	Protective
BC043578	0.806809	0.712542	0.913548	0.00070843822271	Protective
CTSB	1.60138	1.21928	2.10321	0.00071060196684	Risk
MTERFD2	0.440035	0.273575	0.70778	0.00071114067998	Protective
OSBPL7	0.562321	0.402749	0.785116	0.000723194	Protective
MSANTD2	0.46465	0.297838	0.724889	0.000730483	Protective
DTX2	2.02008	1.34314	3.0382	0.000733559	Risk
IL6ST	0.723225	0.599117	0.873041	0.00074226803512	Protective
MYSM1	0.544417	0.382371	0.775136	0.00074372104809	Protective
CLPTM1L	2.05516	1.35202	3.124	0.00074738074834	Risk
GPAT2	0.694895	0.562178	0.858944	0.00076243418015	Protective
TNRC6A	0.414094	0.247794	0.692002	0.00076482660102	Protective
TNN	0.799045	0.700955	0.910861	0.00078753364539	Protective
STK16	0.377027	0.213325	0.666351	0.00078786986292	Protective
SEMA3G	0.71646	0.589688	0.870484	0.00079060770811	Protective
CSNK2B	2.99812	1.5786	5.69411	0.00079385762452	Risk
ZNF141	0.510053	0.344151	0.755931	0.00079692337813	Protective
HMOX1	1.2864	1.11005	1.49078	0.00081464709401	Risk
MRFAP1L1	0.432422	0.264614	0.706649	0.00082096043325	Protective
ZSCAN29	0.38767	0.222521	0.675388	0.00082099788078	Protective
NME5	0.806783	0.711418	0.914933	0.00082241290441	Protective
RAB11FIP1	0.672575	0.533077	0.848576	0.00082449686656	Protective
ABRACL	1.5949	1.21318	2.09673	0.00082450161161	Risk
SLC16A3	1.40106	1.14973	1.70732	0.00082807616864	Risk
RWDD3	0.420967	0.253463	0.699169	0.00083035707491	Protective
CCT4	2.53209	1.46843	4.36622	0.00083179234871	Risk
NGFR	0.806242	0.710568	0.914797	0.00083265858063	Protective
PER2	0.561743	0.400421	0.788058	0.00084089050843	Protective
ARHGAP18	2.085	1.35442	3.20965	0.00084295381592	Risk
RPF2	2.24519	1.39605	3.61081	0.00084915216448	Risk
C12orf45	2.16771	1.37568	3.41576	0.00085396322591	Risk
CD163	1.35888	1.13466	1.62741	0.00085888238062	Risk
SNX29P2	0.575143	0.415166	0.796765	0.000880559	Protective
POTEKP	0.842471	0.76151	0.932039	0.00088336283884	Protective
PSMC4	2.28938	1.40496	3.73054	0.00088490814824	Risk
GFOD2	2.57915	1.47446	4.5115	0.000897067	Risk
ATP6V0D1	2.34328	1.41736	3.87409	0.000901109	Risk
ABCA8	0.791239	0.689054	0.908579	0.00090388480395	Protective
KIAA0430	0.402499	0.235142	0.68897	0.00090514722671	Protective
FRYL	0.437832	0.268781	0.713208	0.00090799365328	Protective
ANGEL1	0.453325	0.283585	0.724665	0.000947996	Protective
ADAM22	0.684576	0.546792	0.85708	0.00094972346642	Protective
GSTM3	0.818007	0.726132	0.921506	0.00095052559719	Protective
LOC93622	0.51718	0.349635	0.765014	0.00096358145124	Protective
PLAUR	1.46489	1.16776	1.83763	0.00096415281528	Risk
PLAC8	0.761018	0.647077	0.895022	0.00096618244809	Protective
ZSCAN18	0.70647	0.574566	0.868656	0.00098299612178	Protective
MRPS18A	2.35341	1.4141	3.91665	0.00099056494841	Risk
BC070495	0.824111	0.734456	0.924711	0.00099490803691	Protective
TGFB3	0.71609	0.586923	0.873684	0.00099997478643	Protective
ARMCX5	0.453055	0.282673	0.726133	0.00100318484242	Protective
ZBTB34	0.438944	0.268749	0.716921	0.00100370421394	Protective
EIF4G1	2.97406	1.55299	5.6955	0.00100982615024	Risk
HSP90B1	2.22726	1.38177	3.5901	0.00101077	Risk
PKI55	0.621649	0.468138	0.825499	0.00101905139754	Protective
RBM5	0.431753	0.261581	0.712632	0.00101962900724	Protective
AARS	1.87639	1.28864	2.73222	0.00102825	Risk
CENPW	1.38874	1.14125	1.68991	0.00104038	Risk
SNRK-AS1	0.432019	0.261482	0.713781	0.00105238342941	Protective
SETD5	0.392791	0.224449	0.687394	0.00106497922933	Protective
STXBP3	0.447362	0.276293	0.724352	0.00106973554875	Protective
ADCY1	0.804843	0.706659	0.91667	0.00107263026191	Protective
C1QA	1.43042	1.1542	1.77275	0.00107549735246	Risk
PFKP	1.38926	1.14078	1.69186	0.00107549998804	Risk
BAG6	3.2774	1.60858	6.67752	0.00107906385947	Risk
NSUN2	2.06374	1.33637	3.18702	0.00108422	Risk
TXNDC17	2.09051	1.34298	3.25413	0.00109057554216	Risk
SLC2A5	1.31019	1.11406	1.54085	0.00109304603642	Risk
STEAP3	1.57905	1.20023	2.07742	0.00109825460611	Risk
DDT	1.81318	1.26809	2.59258	0.00110695750898	Risk
EMC10	2.1435	1.35558	3.38938	0.00110905	Risk
COPS7B	0.33641	0.174771	0.647543	0.00111167717531	Protective
AP4B1	0.361266	0.195843	0.66642	0.00111794313607	Protective
GAS5-AS1	0.671184	0.527919	0.853328	0.00113500688347	Protective
MAFK	2.10514	1.34449	3.29614	0.00113821165961	Risk
RASGRP2	0.661366	0.515493	0.848517	0.00114595059122	Protective
CKAP4	1.9002	1.29026	2.79849	0.00115319706198	Risk
ANKRD37	1.63826	1.21647	2.20629	0.00115332	Risk
KMT2C	0.470481	0.298488	0.741579	0.00116320888269	Protective
PSMD8	2.04384	1.32754	3.14664	0.00116680179826	Risk
NCAPH2	2.05692	1.33077	3.17931	0.00116980923875	Risk
MIR1282	0.869918	0.799715	0.946283	0.00117011	Protective
C1orf64	0.888132	0.826669	0.954165	0.001186	Protective
SLC7A5	1.28376	1.10369	1.49321	0.00119804847444	Risk
RARG	0.573559	0.409666	0.803021	0.00120519	Protective
SCARA5	0.820547	0.727936	0.924941	0.00120825827455	Protective
ZC3H6	0.540724	0.37248	0.784962	0.00122437709289	Protective
IKBKB	0.581059	0.418073	0.807584	0.00122778718594	Protective
ALDOA	1.64015	1.21493	2.21419	0.00123152	Risk
RSBN1	0.417663	0.245864	0.709507	0.00124080992118	Protective
MCM5	1.70929	1.23452	2.36663	0.00124218459665	Risk
PGM3	2.02021	1.31816	3.09618	0.00124656407985	Risk
DARC	0.852525	0.77381	0.939248	0.00124666403993	Protective
RNPC3	0.442217	0.269442	0.725782	0.00124716337604	Protective
CTU1	2.18667	1.35885	3.5188	0.00126743192351	Risk
CDC45	1.3492	1.12452	1.61878	0.00126986663756	Risk
PLD4	0.735722	0.610389	0.886789	0.00127791030127	Protective
MREG	0.675955	0.532598	0.857898	0.00128073	Protective
HS3ST1	1.46721	1.16184	1.85284	0.00128273713122	Risk
LOC728739	0.797481	0.694848	0.915273	0.00128409	Protective
PILRA	1.49855	1.17142	1.91705	0.00128611434769	Risk
SLC12A8	1.81128	1.2615	2.60066	0.00128793445053	Risk
AMPH	0.754365	0.635307	0.895734	0.00129812446257	Protective
GSTO1	2.18754	1.35698	3.52646	0.00131390712378	Risk
EIF3B	2.32563	1.38967	3.89197	0.00131585033379	Risk
GPD1L	0.688769	0.548625	0.864713	0.00131678173243	Protective
CCND2	0.652467	0.502574	0.847065	0.00134461	Protective
GSTM5	0.787657	0.680702	0.911416	0.00134740028477	Protective
EPB41	0.548513	0.379837	0.792095	0.00135955934848	Protective
DYNC2H1	0.665337	0.518459	0.853826	0.00136621	Protective
ACBD4	0.633343	0.47881	0.837751	0.00137205125057	Protective
ADAMTS4	1.42008	1.1456	1.76033	0.00137286583455	Risk
DEK	1.7359	1.23831	2.43344	0.00137308	Risk
EN1	1.21895	1.07973	1.37613	0.00137586825212	Risk
CTU2	2.0135	1.3109	3.09267	0.00139207575083	Risk
JAK1	0.447129	0.272883	0.732637	0.00139940925332	Protective
EXO1	1.34947	1.12278	1.62194	0.00140256808692	Risk
LRRC25	1.55209	1.1851	2.03273	0.00140433351917	Risk
CHTF8	3.12717	1.55265	6.29838	0.00141513413015	Risk
NDUFA4	1.87277	1.27381	2.75336	0.0014192	Risk
CCDC24	0.664513	0.51689	0.854296	0.00142985282475	Protective
LRRC16A	1.83908	1.26421	2.67537	0.00144305349135	Risk
ALKBH8	0.475243	0.300713	0.75107	0.00144331256799	Protective
WDR19	0.565464	0.398135	0.803117	0.00144863107999	Protective
TAF1	0.417522	0.243842	0.714907	0.00145756691726	Protective
HDDC2	2.22952	1.35979	3.65551	0.00148189217157	Risk
EPC1	0.38917	0.217439	0.696534	0.00148487107021	Protective
OSR2	0.767964	0.652549	0.903792	0.00148621823748	Protective
LINC01000	0.554242	0.385008	0.797865	0.00149965801888	Protective
DIAPH3	1.41435	1.14163	1.75223	0.00151480407754	Risk
GALK2	2.33107	1.38175	3.9326	0.00151501065886	Risk
KITLG	0.726742	0.596625	0.885237	0.00151912344869	Protective
CLCN6	0.495956	0.321449	0.765201	0.00152696585133	Protective
GALNT16	0.793237	0.68734	0.915449	0.00153339444694	Protective
CLEC2D	0.60807	0.446947	0.827278	0.00153935420707	Protective
ATF5	1.76352	1.24129	2.50546	0.00154330960218	Risk
STAMBPL1	0.588314	0.423554	0.817165	0.00155417802236	Protective
RNASE1	1.40659	1.13866	1.73757	0.00155431492508	Risk
TLR2	1.46595	1.15659	1.85806	0.00156208039666	Risk
ZNF101	0.559554	0.390231	0.802345	0.00159092056813	Protective
TIMP1	1.71996	1.22828	2.40847	0.00159449102335	Risk
RNF139	0.484949	0.309351	0.760222	0.00160416767786	Protective
OAZ1	2.91445	1.49946	5.66471	0.00160661991904	Risk
COX7A2	2.03868	1.30958	3.17369	0.00160869	Risk
COX6B1	2.28943	1.36823	3.83086	0.00161249679674	Risk
ZNF862	0.582901	0.416776	0.815242	0.00161379433917	Protective
PHLDA2	1.35547	1.12199	1.63754	0.00161400150454	Risk
LINC00657	0.491476	0.316033	0.764316	0.00161625155926	Protective
ZNRF1	1.82783	1.2563	2.65936	0.00161783800864	Risk
SLC35D1	0.456846	0.280641	0.743687	0.00162650543215	Protective
FOXO4	0.544698	0.373284	0.794825	0.00162727169875	Protective
NOL9	0.413706	0.238839	0.716604	0.00163926346554	Protective
CECR5	2.0014	1.29902	3.08358	0.00165409685192	Risk
MAGEE1	0.635689	0.479331	0.843052	0.00165964153876	Protective
AGO4	0.464661	0.288134	0.749337	0.00166953649947	Protective
NUMA1	0.526421	0.352754	0.785587	0.00168111126751	Protective
SGK3	0.748006	0.624044	0.896593	0.00168548952731	Protective
CTBP1-AS2	0.479782	0.303355	0.758818	0.00168977960922	Protective
PAPLN	0.700445	0.560725	0.874981	0.00170982718401	Protective
PCNX	0.455906	0.279024	0.744917	0.00171559603503	Protective
NDUFS6	1.87815	1.26648	2.78522	0.00171829738151	Risk
SYTL1	0.703166	0.564199	0.876362	0.00172008049676	Protective
THRB	0.737452	0.609577	0.892152	0.00172161	Protective
PIP4K2B	0.445803	0.268852	0.739218	0.00174191724235	Protective
CD300A	1.49125	1.16095	1.91552	0.00175859278506	Risk
PDIK1L	0.523049	0.348486	0.785055	0.00175999001229	Protective
SETD2	0.387334	0.213784	0.701772	0.00176075970729	Protective
MON1B	2.36024	1.37798	4.04269	0.00176197720103	Risk
RASL11B	0.763865	0.645125	0.90446	0.00177860856757	Protective
AMIGO1	0.670354	0.521613	0.86151	0.00178078712852	Protective
TTC39A	0.819554	0.72335	0.928553	0.00178709567546	Protective
DNM2	2.24775	1.35187	3.73734	0.00179540918096	Risk
SLC19A2	0.701205	0.561113	0.876272	0.00179962540351	Protective
AK021484	0.79261	0.684922	0.91723	0.00181111162138	Protective
ARF1	2.17505	1.3348	3.54422	0.00181351999284	Risk
SCUBE2	0.87316	0.801814	0.950854	0.00181658213643	Protective
UCHL3	1.92844	1.276	2.91448	0.00182885458316	Risk
C2orf40	0.84893	0.765813	0.941068	0.00183729763808	Protective
MAP3K12	0.524863	0.349853	0.787419	0.00184079404638	Protective
ASNS	1.4144	1.13713	1.75927	0.00184360032616	Risk
TMEM200B	0.596779	0.431244	0.825856	0.00184387039395	Protective
GATSL3	0.607133	0.4435	0.83114	0.00184402423277	Protective
P4HA2	1.73349	1.22601	2.45103	0.00185212981524	Risk
NUDT1	1.83395	1.25181	2.6868	0.00185415336128	Risk
MAP3K1	0.684622	0.539241	0.869198	0.00186459501971	Protective
RAMP3	0.718597	0.583446	0.885054	0.00187949	Protective
NDUFA11	1.97644	1.2862	3.0371	0.00188205523581	Risk
COL14A1	0.820129	0.723705	0.929401	0.00188842662054	Protective
PDIA6	1.85506	1.25625	2.73928	0.00188924	Risk
MCM2	1.52169	1.16763	1.98311	0.00189075470154	Risk
LIFR	0.716146	0.580075	0.884135	0.00190065994726	Protective
AL831889	0.654582	0.500914	0.855391	0.00190834237567	Protective
ZCCHC24	0.707098	0.568112	0.880087	0.00190975432121	Protective
KLHL7	1.96814	1.28308	3.01895	0.00192269377402	Risk
GAPDH	1.56804	1.17997	2.08373	0.00193074791838	Risk
LDB1	0.404007	0.227786	0.716559	0.00193550139417	Protective
ARHGAP19	0.490238	0.312329	0.769486	0.00194088251808	Protective
ZNF703	0.779407	0.665699	0.912537	0.00195137159324	Protective
DDX20	0.403093	0.226785	0.71647	0.00196061170615	Protective
PGM5	0.763362	0.643372	0.90573	0.00196964	Protective
TFB2M	1.91493	1.26842	2.89099	0.00199273538917	Risk
ZNF79	0.415803	0.238306	0.725507	0.00200305151341	Protective
ZNF329	0.591868	0.424284	0.825645	0.00201489455598	Protective
ECE2	1.47558	1.15249	1.88925	0.00203184	Risk
NOMO2	1.9947	1.28644	3.09291	0.00203212714544	Risk
SLC2A3	1.43261	1.14007	1.80021	0.00203652547369	Risk
ERMAP	0.478725	0.299738	0.764594	0.00204562	Protective
PRX	0.640554	0.482585	0.850231	0.00204968971577	Protective
TIMM50	1.94345	1.2736	2.9656	0.00205907409378	Risk
SELP	0.808029	0.705526	0.925423	0.00207161328159	Protective
KCTD7	0.525343	0.348662	0.791553	0.00208698335887	Protective
RRBP1	1.94995	1.27444	2.98351	0.00208709316081	Risk
NAA50	2.36686	1.36709	4.09777	0.00209434138738	Risk
PPWD1	0.407617	0.230063	0.7222	0.00210373741096	Protective
DDAH1	0.671504	0.520934	0.865594	0.00211069340004	Protective
KLHDC9	0.806385	0.702895	0.925111	0.00213533968323	Protective
ABCA9	0.760482	0.638524	0.905734	0.00213939686185	Protective
RANBP1	1.89807	1.26051	2.85812	0.00215112178017	Risk
IBSP	1.19997	1.06803	1.34822	0.00215994261388	Risk
SLC25A45	0.514964	0.336855	0.787245	0.00217960531413	Protective
STAT4	0.705257	0.564052	0.881812	0.00218862110848	Protective
ELF1	0.494319	0.314885	0.776003	0.00219773485364	Protective
GRIK3	0.834942	0.743855	0.937182	0.00220781165759	Protective
PGLYRP2	0.844091	0.757227	0.940919	0.00222028420438	Protective
DDX49	1.99265	1.28017	3.10167	0.00225781162808	Risk
MAST3	0.474389	0.293872	0.765793	0.0022725	Protective
MEOX1	0.803234	0.697666	0.924775	0.00230530166805	Protective
IL20	0.829681	0.73578	0.935566	0.00231291934907	Protective
SAMD4B	2.28631	1.34309	3.89194	0.00231337718912	Risk
SNRPG	2.02808	1.28686	3.19623	0.00231407366375	Risk
AP2S1	2.25415	1.33579	3.80388	0.00233105158594	Risk
FAIM2	1.21936	1.07318	1.38544	0.00233411717236	Risk
BC020644	0.716766	0.578424	0.888194	0.00233745611766	Protective
FAM96B	2.03929	1.28861	3.2273	0.00234548674664	Risk
CCDC121	0.546534	0.370311	0.806618	0.00234974	Protective
PDIA4	1.772	1.22538	2.56244	0.00236590217234	Risk
BCAT1	1.41132	1.13016	1.76244	0.00237061891864	Risk
MRPL52	2.24098	1.33176	3.77092	0.00237365504093	Risk
ZNF644	0.457916	0.276654	0.757939	0.00238204142466	Protective
DTNB	1.77569	1.2258	2.57224	0.00239161555573	Risk
PIM3	1.69039	1.20446	2.37237	0.00239924097739	Risk
FLJ23867	1.34485	1.1107	1.62837	0.00240026676536	Risk
HRASLS	1.24532	1.0808	1.43487	0.00240643043859	Risk
PLXNB2	2.25986	1.33413	3.82795	0.00242907476728	Risk
ZNF786	0.474558	0.293002	0.768616	0.00244869414644	Protective
ATF7IP2	0.680725	0.530761	0.873061	0.00245241376552	Protective
RNF4	0.31514	0.14919	0.665685	0.00247367385085	Protective
THAP3	0.41334	0.233191	0.732659	0.00248549105449	Protective
PPP3CA	1.46195	1.14302	1.86986	0.00248980746871	Risk
INO80D	0.425613	0.244597	0.740591	0.00250646429095	Protective
TPSB2	0.846252	0.759412	0.943022	0.00251157954295	Protective
SPARCL1	0.727031	0.591186	0.89409	0.00252130698255	Protective
CTSA	1.92619	1.25864	2.94778	0.00253182298585	Risk
TOM1	2.28691	1.33639	3.91351	0.00254569549904	Risk
ZNF512	0.604213	0.435582	0.838127	0.00254787815344	Protective
ARID4A	0.445978	0.263937	0.753575	0.00255212450718	Protective
P2RY6	1.38883	1.12188	1.7193	0.00256159585036	Risk
MFSD1	2.26366	1.33104	3.84975	0.00256631	Risk
ZNF839	0.498708	0.317128	0.784255	0.00259453685602	Protective
FTL	1.47927	1.14646	1.9087	0.00260399797801	Risk
EPRS	2.0162	1.27718	3.18285	0.00261058	Risk
COPE	2.06361	1.28719	3.30837	0.00262708489523	Risk
HSPA5	1.95664	1.2634	3.03027	0.00263332219792	Risk
RBM43	0.583639	0.410889	0.829019	0.00263718875202	Protective
SNED1	0.692321	0.544759	0.879854	0.00264227982064	Protective
SPATA7	0.502654	0.320908	0.787331	0.00266202315474	Protective
MAST4	0.718546	0.579149	0.891494	0.00266661435393	Protective
PLOD1	1.65993	1.19246	2.31065	0.00267308751854	Risk
HSPA1B	1.58228	1.17266	2.13497	0.00268243942068	Risk
EMCN	0.71873	0.579313	0.891698	0.00268373671902	Protective
PCNA	1.66165	1.19261	2.31515	0.00269202652278	Risk
DKFZp761D112	0.791263	0.679062	0.922002	0.00269258315138	Protective
ALG3	1.85222	1.23832	2.77045	0.00269525207594	Risk
TBL1X	0.613065	0.445299	0.844037	0.00270527	Protective
FH	1.94169	1.25853	2.99567	0.00270555611955	Risk
MTCH1	2.42772	1.35952	4.33523	0.00271607527769	Risk
LIMCH1	1.46768	1.14195	1.88634	0.00272979427516	Risk
EVL	0.712658	0.571003	0.889454	0.00273489839163	Protective
AL832891	0.804575	0.697872	0.927593	0.00274111070897	Protective
ITPK1	0.547304	0.368889	0.81201	0.00274864967375	Protective
BAIAP2L1	1.51579	1.15436	1.99038	0.00276374992547	Risk
ATP2C1	2.34139	1.3412	4.08746	0.00276581916065	Risk
SCAF1	2.17288	1.30704	3.61231	0.00276752220409	Risk
ABCA11P	0.519891	0.338576	0.798305	0.00279490352952	Protective
CEP290	0.497397	0.314663	0.78625	0.00279585512054	Protective
ABCA6	0.753526	0.625919	0.90715	0.00279588281248	Protective
OGT	0.518607	0.337092	0.797863	0.00281390466999	Protective
AX747537	1.37152	1.11456	1.68772	0.00283962852127	Risk
ZBTB43	0.407029	0.225543	0.734551	0.00284387123627	Protective
MRPS10	2.26298	1.32315	3.87035	0.00285794436978	Risk
FCER1G	1.48834	1.14607	1.93284	0.00285876411837	Risk
AKAP10	0.473884	0.290042	0.774252	0.00286908498886	Protective
FKBP1A	2.34459	1.33895	4.10554	0.00287187634121	Risk
CDKN3	1.391	1.11965	1.72812	0.00287544489105	Risk
PKIA	0.753802	0.625952	0.907765	0.00287817832865	Protective
PPP1R1B	1.15369	1.05014	1.26746	0.00288568606204	Risk
RGS3	1.90026	1.24561	2.89896	0.00289052016184	Risk
TLR1	1.59943	1.17425	2.17856	0.00289392751132	Risk
APLN	1.3347	1.10378	1.61393	0.00289424570548	Risk
FAM69A	0.58525	0.411392	0.832581	0.00289427430502	Protective
CCDC146	0.630145	0.465024	0.853899	0.00289451158199	Protective
FAM134A	0.403687	0.222144	0.733594	0.00291553776986	Protective
KLF12	0.643356	0.481176	0.8602	0.00291938600084	Protective
RAB11FIP3	0.591525	0.418568	0.835949	0.00292612958259	Protective
CALML3	0.870092	0.79386	0.953645	0.00293452511095	Protective
MRPL14	1.83501	1.22976	2.73813	0.00295091	Risk
SYTL5	0.825783	0.727861	0.936878	0.00295465520743	Protective
AP1B1	2.16922	1.30153	3.61535	0.00296686074353	Risk
GOLGA1	0.438801	0.254776	0.755748	0.00298223072975	Protective
GTF3C5	2.0179	1.26932	3.20794	0.00299487191499	Risk
KIAA0232	0.588479	0.414566	0.835349	0.00301183	Protective
DUSP28	0.504189	0.320677	0.792716	0.00301626044322	Protective
ALAS1	2.18116	1.30257	3.65235	0.00302702846197	Risk
HDAC11	0.680899	0.528116	0.877882	0.00303093318053	Protective
FAM64A	1.32117	1.09896	1.58833	0.00303433758443	Risk
DENND2D	0.630562	0.464818	0.855406	0.00303957450647	Protective
SLC39A7	2.06867	1.27901	3.34585	0.00304562835498	Risk
XBP1	0.778521	0.659649	0.918815	0.00306087015463	Protective
AIMP2	2.22995	1.31062	3.79414	0.00310148989938	Risk
CHIC1	0.604428	0.43295	0.843823	0.00310177436932	Protective
ZFHX4	0.745016	0.612844	0.905695	0.00313642748012	Protective
USP47	0.430264	0.245872	0.752938	0.00313802286636	Protective
SH3D21	0.7002	0.552743	0.886995	0.00313818315591	Protective
CTBP1	0.364638	0.186569	0.712664	0.00317002793431	Protective
BRIX1	2.01848	1.26559	3.21925	0.00318871857882	Risk
PTP4A2	0.559352	0.380176	0.822974	0.00318937	Protective
PTEN	0.543429	0.362253	0.815218	0.00320558736156	Protective
CDC14A	0.714163	0.57088	0.893408	0.00321419284346	Protective
CCR1	1.36445	1.1096	1.67784	0.00322114013138	Risk
SH3D19	0.672606	0.516604	0.875717	0.00322254	Protective
GPRIN1	1.35301	1.10642	1.65458	0.0032294	Risk
IKZF2	0.699159	0.550964	0.887215	0.00323390952774	Protective
PTBLP	0.816442	0.713331	0.934457	0.00323917031887	Protective
GSTM2	0.764433	0.639165	0.91425	0.00326356547644	Protective
ANKRA2	0.565637	0.386939	0.826862	0.00326770495353	Protective
RAC1	3.13881	1.46445	6.72753	0.00327466515923	Risk
USP31	0.547077	0.365963	0.817823	0.00327847230493	Protective
HIVEP3	0.576443	0.399232	0.832315	0.00328959653178	Protective
GIPC1	2.01599	1.26288	3.2182	0.00330320120146	Risk
SNAP23	0.431642	0.246435	0.756039	0.00330445853505	Protective
NLN	1.98666	1.2565	3.14113	0.00331606742603	Risk
AHNAK	0.684201	0.531049	0.881522	0.00333163509085	Protective
TMEM128	0.4867	0.300842	0.787378	0.00334730193142	Protective
KARS	1.90945	1.23925	2.9421	0.00336292210218	Risk
HK2	1.51343	1.14701	1.99691	0.00339297953065	Risk
KCNS3	1.35118	1.10473	1.6526	0.00339609668423	Risk
AB306139	0.904311	0.845417	0.967308	0.00341882549463	Protective
SRD5A1	1.34091	1.10172	1.63204	0.00342993361639	Risk
BYSL	1.80052	1.21421	2.66994	0.00343852129639	Risk
WBSCR22	2.13675	1.28475	3.55377	0.00344099208625	Risk
TTC8	0.639051	0.473373	0.862716	0.00345128019936	Protective
MTHFD1L	1.51352	1.14624	1.99848	0.00347382481546	Risk
RICTOR	0.512554	0.327315	0.802628	0.00349124960581	Protective
SLC16A1	1.34075	1.10119	1.63242	0.00350237442404	Risk
CC2D2A	0.629875	0.461828	0.859071	0.00350759008585	Protective
FAM214B	2.05248	1.26645	3.32634	0.00351304038081	Risk
SLC3A2	1.79128	1.21093	2.64977	0.00352272479658	Risk
PHGDH	1.26106	1.07908	1.47372	0.00353165359816	Risk
PEX11A	0.725391	0.584618	0.900063	0.00354038152167	Protective
PLCD4	0.641905	0.476381	0.864943	0.00357373971142	Protective
ADCY6	0.657352	0.495664	0.871783	0.00358493669533	Protective
OMD	0.817173	0.713279	0.936199	0.00361156415987	Protective
SNIP1	0.38744	0.204527	0.733936	0.0036262	Protective
MDH1	2.42073	1.33402	4.39267	0.00363842	Risk
LOC148413	0.493228	0.306284	0.794276	0.00364414161794	Protective
PML	2.08005	1.2693	3.40865	0.00365817585392	Risk
MAP3K13	1.96525	1.24601	3.09969	0.00366104494098	Risk
DENND5B	0.654026	0.491129	0.870955	0.00366839	Protective
BSG	1.826	1.21641	2.74109	0.00367073200468	Risk
B3GNT5	1.35903	1.10495	1.67154	0.00367270753779	Risk
ATP2A2	2.43344	1.33521	4.43499	0.00368487836678	Risk
TMEM164	0.6925	0.540278	0.88761	0.00371566368835	Protective
ZSCAN30	0.552704	0.370242	0.825087	0.0037258	Protective
CTR9	0.470323	0.282485	0.783064	0.00373011129963	Protective
LAMA2	0.793651	0.67884	0.927879	0.00374514702844	Protective
NBPF9	0.625194	0.455079	0.858902	0.00374799314623	Protective
MIF	1.66125	1.17834	2.34207	0.00377411068145	Risk
NCEH1	1.52856	1.14696	2.03712	0.00378393966561	Risk
VPS37B	1.77589	1.2039	2.61963	0.00378480894071	Risk
LRRC37A4P	0.576022	0.396492	0.836843	0.00379548122929	Protective
KDM8	0.498485	0.311021	0.798943	0.00382048938442	Protective
C16orf45	0.781127	0.660713	0.923486	0.00382992456502	Protective
EIF3J-AS1	0.59956	0.423759	0.848292	0.0038622	Protective
LHFP	0.715037	0.569505	0.89776	0.00386635190014	Protective
LPCAT1	1.54374	1.1497	2.07282	0.00388039111415	Risk
FLJ00382	0.866193	0.785681	0.954955	0.00390236105999	Protective
WDR82	0.36078	0.180479	0.721204	0.00391676780767	Protective
UMPS	2.45218	1.33312	4.51062	0.00391888154381	Risk
SELL	0.782385	0.662184	0.924407	0.00393219587861	Protective
SGK223	0.724298	0.581697	0.901857	0.00393425164668	Protective
TBCK	0.537642	0.352585	0.819829	0.00394106274419	Protective
GIGYF1	0.501381	0.313478	0.801913	0.00396094406201	Protective
TBC1D12	0.553997	0.370703	0.82792	0.00396157014069	Protective
KCNJ3	0.872733	0.795543	0.957413	0.00396315435079	Protective
DST	0.700655	0.549965	0.892633	0.00398637632162	Protective
AK022997	0.799451	0.686442	0.931066	0.00399549010432	Protective
MFAP4	0.839948	0.745882	0.945877	0.00399995091707	Protective
NR1H2	2.80361	1.38918	5.65817	0.00400864811627	Risk
GSTM4	0.688075	0.533278	0.887806	0.00403837288373	Protective
TPSAB1	0.831812	0.733662	0.943093	0.00404590165868	Protective
ZBED4	1.95183	1.23708	3.07954	0.00404783554594	Risk
PLOD2	1.43314	1.12126	1.83178	0.00405304	Risk
RDX	1.92971	1.23233	3.02173	0.00406634201016	Risk
ZBED3	0.598328	0.42139	0.849562	0.00408625772016	Protective
CLDN15	0.586895	0.407827	0.844587	0.00411196215244	Protective
HBEGF	1.42504	1.11875	1.81518	0.00411992543238	Risk
ME1	1.30132	1.0869	1.55803	0.00414263	Risk
ICAM1	1.37976	1.10721	1.71941	0.00414410809632	Risk
PGR	0.878552	0.804065	0.959939	0.00417723401846	Protective
DCP2	0.487729	0.298389	0.797212	0.00418363697917	Protective
SF3B5	1.96155	1.23694	3.11066	0.00418586002632	Risk
P4HB	1.70806	1.18392	2.46424	0.00419945622982	Risk
ANLN	1.3143	1.08999	1.58476	0.00420319622081	Risk
RGS12	0.543576	0.358062	0.825206	0.00421021678106	Protective
LPPR3	0.864683	0.782697	0.955257	0.00422860093449	Protective
CARS	2.24716	1.2903	3.91361	0.00423127846699	Risk
FAHD2B	0.663273	0.500617	0.878776	0.00423373	Protective
BOD1L1	0.420101	0.231777	0.761444	0.00426125640439	Protective
PRAME	1.10465	1.03176	1.1827	0.00426729395854	Risk
TRPM2-AS	1.23243	1.06785	1.42238	0.00426900941547	Risk
THRAP3	0.333745	0.15722	0.708469	0.00427175453657	Protective
ABI3BP	0.80323	0.691139	0.9335	0.00427227481469	Protective
TPMT	1.85195	1.21333	2.82668	0.00428721452045	Risk
SOD2	1.39854	1.11097	1.76055	0.00429015	Risk
EIF4H	3.8414	1.52501	9.67627	0.00430024321411	Risk
PPAP2B	0.637162	0.467593	0.868225	0.00430358179452	Protective
BRD8	0.517163	0.328868	0.813267	0.00430566861952	Protective
THSD1	0.649857	0.483365	0.873697	0.00431634862962	Protective
AB209061	0.658684	0.49448	0.877417	0.00431927663225	Protective
WDFY1	0.45892	0.268713	0.783764	0.00434211988794	Protective
CKMT2-AS1	0.590595	0.411209	0.848236	0.00435732048617	Protective
PARD6G	0.597296	0.419091	0.851277	0.00436310561172	Protective
KPNA1	2.43573	1.32059	4.49251	0.00436793	Risk
KLF2	0.706802	0.55675	0.897296	0.00437150372805	Protective
FBLN7	0.726066	0.582568	0.904909	0.00438062368015	Protective
MIER1	0.450411	0.260184	0.779718	0.00439052211327	Protective
TRMT6	1.88241	1.21811	2.909	0.00439384883584	Risk
TNIP2	0.372945	0.189153	0.735319	0.00440501306099	Protective
ZNF407	0.438806	0.248792	0.773943	0.00443989	Protective
BX537811	0.718474	0.572119	0.902269	0.00444288684634	Protective
CEBPB	1.50101	1.13455	1.98584	0.00445647726616	Risk
N4BP2L2	0.539816	0.352937	0.825645	0.00446004202217	Protective
MYO15B	0.725565	0.58151	0.905308	0.00449821977635	Protective
MPP1	1.52103	1.1386	2.0319	0.00453300897414	Risk
TTC1	2.38092	1.30783	4.33447	0.00454078943766	Risk
DDX19B	2.28616	1.2914	4.0472	0.00454657634714	Risk
PKD1P1	0.67703	0.517127	0.886376	0.00454851119262	Protective
TNRC6C	0.646142	0.477806	0.873783	0.00456609071855	Protective
H2AFZ	1.65737	1.16885	2.35007	0.00457340814321	Risk
SERP2	0.784728	0.66354	0.928049	0.00461978013703	Protective
PLEKHA5	0.606853	0.429519	0.857403	0.00461984	Protective
FPR1	1.35652	1.09847	1.67519	0.00462122802509	Risk
NAPSB	0.783131	0.661153	0.927614	0.00465816112012	Protective
LYPD6	0.841475	0.746659	0.948333	0.00465912203724	Protective
GUSB	1.48279	1.1287	1.94795	0.00466040116879	Risk
PSMC3	2.12117	1.25962	3.572	0.00468417287335	Risk
TRPV4	1.42152	1.11395	1.81403	0.00469287056227	Risk
LAMA3	0.814519	0.706526	0.93902	0.00469946	Protective
CCT5	1.73682	1.18414	2.54744	0.00473064048748	Risk
SEC61B	2.247	1.28129	3.94057	0.00473092408101	Risk
SERPINE1	1.29181	1.08151	1.54301	0.00473849609581	Risk
PTPRT	0.872334	0.793447	0.959065	0.00473945951661	Protective
SMARCB1	2.16892	1.26729	3.71202	0.00474307464104	Risk
ZNF397	0.570385	0.386304	0.842185	0.00474548160785	Protective
RNF125	0.657277	0.491181	0.879539	0.00474851710112	Protective
PQLC3	0.587484	0.406063	0.849959	0.00476284731376	Protective
CCBL2	0.576403	0.393169	0.845032	0.00476342932278	Protective
RAD23A	2.06725	1.24844	3.42311	0.00476791	Risk
ETFB	1.64307	1.16373	2.31985	0.00477918	Risk
EPC2	0.466523	0.274688	0.792328	0.00478243336259	Protective
TMEM167B	0.416338	0.226501	0.76528	0.00478336871861	Protective
PRMT6	0.653061	0.485732	0.878032	0.00478438094622	Protective
RBM12B	0.45232	0.260625	0.78501	0.00479469321337	Protective
CCR7	0.804464	0.691558	0.935804	0.00480443	Protective
ARHGEF25	0.652632	0.485078	0.878062	0.00481778	Protective
EEFSEC	2.23353	1.27727	3.90573	0.00482909	Risk
IL16	0.69517	0.539815	0.895236	0.00483936415217	Protective
PCMTD2	0.570052	0.385539	0.84287	0.00485252295714	Protective
MAP1S	2.17386	1.26624	3.73205	0.00486250258419	Risk
ASS1	1.26229	1.07331	1.48454	0.00487910107841	Risk
ACOT2	0.601543	0.42222	0.857027	0.00488900125424	Protective
AXIN2	0.725069	0.579608	0.907036	0.00489234501449	Protective
PDCD5	1.72781	1.18043	2.52903	0.0049033	Risk
ZNF236	0.502556	0.311157	0.81169	0.00490924029442	Protective
FAM207A	1.73234	1.18127	2.54051	0.00491263750945	Risk
RPP21	1.99517	1.2322	3.23059	0.00496768693538	Risk
CCDC174	0.363452	0.179337	0.736589	0.00498122715411	Protective
SEMA3B	0.81292	0.7035	0.939358	0.00498314548946	Protective
CHST15	0.645161	0.475108	0.876082	0.00499361205429	Protective
RNF25	0.365584	0.181074	0.738104	0.00499907312751	Protective
FDXACB1	0.607736	0.429185	0.860568	0.00501522234425	Protective
ZBTB2	0.496582	0.304535	0.809737	0.00501725364355	Protective
IGJ	0.876678	0.799624	0.961158	0.00504792137683	Protective
CWF19L2	0.499255	0.307209	0.811355	0.00505131005503	Protective
MCUR1	1.98383	1.22877	3.20286	0.00506463535789	Risk
ZNF510	0.503978	0.311981	0.81413	0.00510480056512	Protective
NEK1	0.483091	0.290301	0.803914	0.00511128145609	Protective
CCNT2	0.4859	0.293158	0.805363	0.00511670209446	Protective
ADI1	1.64204	1.16029	2.32383	0.00512592205607	Risk
RRP15	1.92986	1.21777	3.05834	0.00513184807302	Risk
CENPA	1.28964	1.0792	1.54111	0.00513229630529	Risk
GAPT	0.716328	0.567048	0.904908	0.00514213117864	Protective
ATG3	2.62091	1.33449	5.14742	0.00514445229648	Risk
NEK9	0.494347	0.301678	0.810065	0.00517561866074	Protective
PTTG1	1.33395	1.0898	1.6328	0.00521029482813	Risk
ALDH1A2	0.793119	0.67407	0.933194	0.00521900065329	Protective
MGEA5	0.484232	0.291059	0.805612	0.00523469783238	Protective
MYH11	0.826055	0.72235	0.944649	0.00524012650626	Protective
ASB1	0.553786	0.365606	0.838824	0.00527774929074	Protective
LMF2	1.91479	1.21295	3.02273	0.00529145	Risk
GJB1	1.13965	1.03961	1.24931	0.00529178624204	Risk
CBX7	0.687031	0.52766	0.894538	0.00531019748807	Protective
MRPS5	2.50599	1.31348	4.78118	0.00531519704812	Risk
NBPF14	0.595838	0.413997	0.857548	0.00531658681837	Protective
CCL8	1.20574	1.05706	1.37532	0.00532872940919	Risk
PCF11	0.483469	0.289969	0.806095	0.00533001636617	Protective
CCL21	0.87391	0.794854	0.960828	0.00533701007493	Protective
TPRKB	2.2647	1.2741	4.02551	0.00534678522947	Risk
ADAM33	0.791402	0.671273	0.933029	0.00534924074923	Protective
PSMD2	1.92131	1.21293	3.0434	0.00539381	Risk
FADS2	1.21934	1.06035	1.40216	0.00540284	Risk
CCDC74A	0.827583	0.724264	0.94564	0.00541168	Protective
TLN2	0.652316	0.482723	0.881493	0.00541792098057	Protective
KIAA2026	0.467367	0.273287	0.799275	0.00546378416872	Protective
ALDH2	0.729137	0.583476	0.911162	0.00546657	Protective
OBFC1	0.47859	0.284558	0.804927	0.00546895950015	Protective
NOC4L	2.09907	1.24399	3.54191	0.00547140048281	Risk
FRZB	0.778826	0.652884	0.929062	0.00547695698741	Protective
THUMPD1	0.537362	0.346676	0.832934	0.00547895406814	Protective
CCDC71	0.470182	0.276048	0.800844	0.00548071138184	Protective
DNALI1	0.856215	0.767362	0.955356	0.00548691698432	Protective
MMP28	0.746258	0.606956	0.917531	0.00549619822572	Protective
ST14	1.59053	1.14601	2.20748	0.00552195887569	Risk
MRPL3	2.27411	1.27266	4.06359	0.00553621144777	Risk
C12orf49	1.82685	1.19343	2.79646	0.00553762396926	Risk
EPN1	2.35282	1.28452	4.30959	0.00559167142467	Risk
PNP	1.51676	1.12962	2.03656	0.00559501023217	Risk
TMEM38A	1.3703	1.09644	1.71255	0.00561710109116	Risk
FGF1	0.760785	0.626921	0.923233	0.00562504682262	Protective
RFC4	1.54596	1.13558	2.10464	0.00564471358826	Risk
TRIM13	0.494515	0.30017	0.814688	0.00569927464519	Protective
C10orf32	0.599574	0.417184	0.861704	0.0057044	Protective
PLIN5	0.837195	0.738074	0.949627	0.00571210967174	Protective
NBPF10	0.633568	0.458378	0.875714	0.00571662504644	Protective
IL11RA	0.655865	0.486281	0.884591	0.00572109128054	Protective
SMIM20	0.611713	0.431669	0.866851	0.00572149690292	Protective
AQP9	1.17585	1.04822	1.31902	0.00572240582983	Risk
RBM6	0.467412	0.2725	0.801738	0.00573358509959	Protective
SHFM1	1.89264	1.20347	2.97646	0.00574976394027	Risk
FAM83E	0.863039	0.777314	0.958217	0.00578711783735	Protective
SLC5A1	1.16415	1.04502	1.29687	0.00579019942889	Risk
MCFD2	2.6759	1.32984	5.38444	0.00579805338658	Risk
RBMS2	0.558358	0.369078	0.844709	0.00579887070911	Protective
SLC40A1	0.826874	0.722382	0.94648	0.00581625414505	Protective
HIPK1	0.439181	0.244638	0.788428	0.00584741339169	Protective
RTN4R	1.45643	1.11466	1.90301	0.00586105247402	Risk
SLC35A3	0.618709	0.4397	0.870597	0.00586583800144	Protective
PLCD3	0.728008	0.580809	0.912513	0.00588126	Protective
HIF1A	1.48608	1.12098	1.9701	0.00588992232572	Risk
MED10	2.06387	1.23227	3.45667	0.00589205506279	Risk
MAPT	0.87444	0.794793	0.962068	0.00589469114532	Protective
UGCG	0.733483	0.588194	0.914659	0.00592362909931	Protective
SEPSECS	0.574879	0.387558	0.852739	0.00592639720336	Protective
CLDN1	1.26121	1.06903	1.48794	0.00593536883421	Risk
NAT8L	0.808571	0.694928	0.940798	0.00596543696336	Protective
CDAN1	0.513643	0.31946	0.825861	0.00596676907141	Protective
DGUOK	2.50521	1.30179	4.82112	0.00596689213354	Risk
KAT6A	0.578419	0.391528	0.85452	0.00596734868508	Protective
KIAA1468	0.515025	0.320904	0.826574	0.00597635893241	Protective
FAM73B	0.502511	0.307634	0.820836	0.00598616919331	Protective
FAM20C	1.53768	1.1313	2.09003	0.00599922084541	Risk
NBPF15	0.670471	0.504024	0.891885	0.00603562956939	Protective
PDCD4	0.740081	0.596919	0.91758	0.00606649735505	Protective
TSPY26P	0.719545	0.568772	0.910286	0.00607962104113	Protective
SLC4A1AP	2.77504	1.33841	5.75376	0.00608014838846	Risk
SCARNA2	0.749488	0.60988	0.921054	0.00610844329487	Protective
CMC2	1.62267	1.14794	2.29372	0.00611958532417	Risk
BIRC5	1.25954	1.06796	1.48548	0.00612432335923	Risk
KMT2A	0.546337	0.354595	0.841759	0.00612450678749	Protective
CUTC	0.440757	0.245323	0.791879	0.00613387298605	Protective
PTN	0.825003	0.718919	0.94674	0.00615646796586	Protective
COL17A1	0.871927	0.790478	0.961769	0.00616224433936	Protective
VPS29	2.3072	1.26841	4.19675	0.00616495476836	Risk
RAPGEF5	1.60222	1.14336	2.24523	0.00617806133833	Risk
ZBED5	0.548897	0.357263	0.843324	0.00618731002756	Protective
CARF	0.570785	0.382035	0.852792	0.00619449594822	Protective
COX4I1	1.98747	1.21509	3.25083	0.00621952565665	Risk
SGPP2	1.1868	1.04976	1.34173	0.00622396794618	Risk
TMEM161A	1.9048	1.20048	3.02235	0.00622493743106	Risk
CCNE1	1.26905	1.06989	1.50528	0.00622606	Risk
ZBTB48	0.464937	0.268548	0.804944	0.00624213083371	Protective
TLS/FUS-ERG	0.930228	0.883238	0.979719	0.00624418997781	Protective
C14orf169	0.488356	0.292162	0.816297	0.00625040372736	Protective
SLC39A14	1.67243	1.15668	2.41815	0.00626311446273	Risk
NME3	0.661733	0.49212	0.889805	0.00628210274658	Protective
NAP1L1	0.476089	0.279583	0.810711	0.00628345680034	Protective
RPS10P7	0.675717	0.510105	0.895096	0.00628512555763	Protective
MYEOV2	0.589356	0.403259	0.861336	0.00631454983658	Protective
KLRB1	0.80999	0.696271	0.942281	0.00632956178512	Protective
THYN1	0.520364	0.32546	0.831987	0.00636865882151	Protective
NUTF2	1.85923	1.19074	2.90301	0.00637508282546	Risk
EME2	0.728424	0.580074	0.914713	0.00638739091937	Protective
GOLPH3	2.27231	1.25897	4.1013	0.00644309764512	Risk
MSH6	1.84901	1.18813	2.87751	0.00645207702296	Risk
RERG	0.831665	0.728359	0.949623	0.00645373187178	Protective
MAN1A1	0.716383	0.563476	0.910784	0.00647246248484	Protective
HPSE	1.40976	1.10094	1.80519	0.00648310314811	Risk
MPDZ	0.654334	0.482104	0.888093	0.00649948172084	Protective
FAM21C	0.522278	0.32707	0.833991	0.00652474253016	Protective
ZNF449	0.479307	0.282148	0.814235	0.00652691301322	Protective
LGALS2	0.828638	0.723656	0.94885	0.00653579213382	Protective
FLRT2	0.78495	0.659193	0.934699	0.00656766883117	Protective
PGM2L1	1.39729	1.09775	1.77858	0.00657651051525	Risk
ADH1B	0.902192	0.837631	0.971728	0.00658738634295	Protective
GLRX3	1.97024	1.20794	3.21361	0.00659195396052	Risk
SERPINF2	0.734803	0.588321	0.917755	0.00659641119734	Protective
PDK1	1.4689	1.11283	1.9389	0.00663345832524	Risk
VSIG2	0.859849	0.771031	0.958898	0.00663859532623	Protective
PYROXD2	0.727469	0.578129	0.915386	0.00664584068086	Protective
MCM3	1.65629	1.15048	2.38447	0.00664852002762	Risk
KIF5C	0.823509	0.71573	0.947519	0.00666348687048	Protective
CCDC88C	0.678441	0.512552	0.89802	0.00669135789803	Protective
CTSG	0.845827	0.749381	0.954685	0.00671382600676	Protective
OGN	0.867868	0.783325	0.961537	0.00672800590965	Protective
AJ420573	0.637976	0.460892	0.883099	0.00674123164071	Protective
LOC100379224	0.549161	0.355917	0.847328	0.00675567	Protective
PTPRO	1.46616	1.11156	1.93388	0.00675652550114	Risk
GSC	0.799566	0.680071	0.940058	0.00676059201237	Protective
SYNE1	0.648001	0.473381	0.887036	0.00676491148754	Protective
COX5B	2.24451	1.25017	4.0297	0.00677356769439	Risk
RALGAPA1	0.615905	0.433609	0.874841	0.00679511547071	Protective
HGSNAT	0.560336	0.368339	0.85241	0.00681000504748	Protective
WDR78	0.699668	0.540173	0.906258	0.00681704777094	Protective
ANXA5	2.08547	1.2241	3.55296	0.00685477169971	Risk
ZNF564	0.522435	0.326281	0.836514	0.0068673	Protective
CDT1	1.32254	1.0798	1.61983	0.00689015377522	Risk
CD27	0.801542	0.682674	0.941108	0.00691127610218	Protective
PFDN5	0.429806	0.232874	0.793278	0.00692138864034	Protective
ZNF740	0.584619	0.395986	0.86311	0.00692182018718	Protective
ACSF2	0.750108	0.608794	0.924224	0.00693656723977	Protective
CSAD	0.742033	0.597512	0.921509	0.00694295708108	Protective
S100A8	1.11606	1.03046	1.20878	0.00699919148525	Risk
C14orf28	0.558452	0.365648	0.85292	0.00701269318859	Protective
AK298056	1.46166	1.10918	1.92615	0.00701855095372	Risk
UBE2S	1.39282	1.09442	1.77259	0.00707249761142	Risk
PSMF1	2.45481	1.27691	4.71927	0.00708154416247	Risk
WDR46	2.4924	1.28165	4.84694	0.00711926242566	Risk
VPS39	0.46731	0.268502	0.813325	0.00712833310086	Protective
S100A9	1.1201	1.03128	1.21658	0.00713332554332	Risk
ITPR1	0.749049	0.606864	0.924547	0.00713599807015	Protective
NUP62	2.26578	1.24857	4.11172	0.00714287332818	Risk
PDIA3	1.90704	1.19139	3.05257	0.00715429712583	Risk
PRDM10	0.440943	0.242784	0.800839	0.00715768127644	Protective
LANCL1	0.54424	0.349323	0.847918	0.00716235296854	Protective
AL833150	0.637228	0.458823	0.885	0.00716775603276	Protective
COX17	1.62786	1.14086	2.32274	0.00721957993767	Risk
C1QTNF4	0.778148	0.647988	0.934454	0.00723424601506	Protective
LYRM9	0.672578	0.50348	0.898469	0.00726139676107	Protective
SLC25A19	1.51078	1.11773	2.04204	0.00727678575113	Risk
PPM1K	0.735863	0.588124	0.920714	0.00730946151555	Protective
SP1	0.405019	0.209205	0.784111	0.00732889639151	Protective
SEMA5A	0.746173	0.602415	0.924238	0.00732923145365	Protective
ERCC6	0.494019	0.295016	0.82726	0.00734226451173	Protective
PRDX4	1.60637	1.13592	2.27166	0.00734530816439	Risk
EGFL8	0.684427	0.518704	0.903097	0.00735109531826	Protective
KANK3	0.666609	0.495547	0.896722	0.00735229535018	Protective
NDUFA12	2.05314	1.21322	3.47455	0.00736165073819	Risk
DHODH	1.87281	1.18356	2.96345	0.00736849300925	Risk
GINS3	1.64989	1.14361	2.38032	0.00741690999497	Risk
BOLA3	1.907	1.18886	3.05896	0.00741777857555	Risk
CXCL16	1.61409	1.13688	2.29162	0.00742098148958	Risk
ARSG	0.778454	0.648047	0.935102	0.00742281998601	Protective
SLC25A30	0.555213	0.360728	0.854555	0.00748781048079	Protective
CCDC167	1.56665	1.12733	2.17718	0.00750076212662	Risk
GAS2L3	1.50344	1.11491	2.02736	0.00751619999422	Risk
FCHSD1	0.628863	0.447508	0.883713	0.00753688635713	Protective
OSCAR	1.37839	1.08921	1.74434	0.00755756684259	Risk
BOP1	1.45869	1.10572	1.92435	0.00756497827709	Risk
PKMYT1	1.34622	1.08226	1.67455	0.00758679218842	Risk
FAM13B	0.591473	0.402257	0.869693	0.00759076477331	Protective
SMARCAD1	0.464678	0.264718	0.815681	0.00759381606913	Protective
MLPH	0.858979	0.768214	0.960469	0.00763435502026	Protective
LCA5L	0.694142	0.530808	0.907737	0.00764942242904	Protective
DDOST	2.24099	1.23835	4.05543	0.00766743763116	Risk
EMC8	1.94253	1.19222	3.16504	0.00767949090814	Risk
PSMB1	2.06041	1.21078	3.50623	0.00769661	Risk
TADA2B	0.565425	0.37173	0.860047	0.00770961020733	Protective
UBA5	2.25834	1.24032	4.11193	0.00771351	Risk
NCAPG	1.32976	1.07815	1.6401	0.00774376934817	Risk
COLGALT1	1.72988	1.15543	2.58992	0.00777682144091	Risk
TEK	0.713103	0.555903	0.914757	0.00778665547787	Protective
KDELR2	1.92759	1.18867	3.12585	0.00779798331032	Risk
USP13	1.57705	1.1274	2.20603	0.00780878342243	Risk
NPIPA1	0.670388	0.499307	0.900087	0.00780956743685	Protective
MED28	0.45585	0.255469	0.813401	0.00783699206928	Protective
TALDO1	1.89956	1.18372	3.04832	0.00783997570075	Risk
EPHB2	1.50298	1.11288	2.02982	0.00787142812622	Risk
SMC4	1.53525	1.11874	2.10683	0.00793556114598	Risk
ZNF20	0.579056	0.386806	0.866857	0.00795351	Protective
DCP1A	0.418566	0.219993	0.796378	0.00796115725455	Protective
MLH3	0.512299	0.312595	0.839584	0.00796186143616	Protective
HEXB	2.14038	1.22	3.7551	0.00797096151317	Risk
VIPAS39	0.413359	0.215204	0.793971	0.00798464097076	Protective
ZBTB14	0.483374	0.28243	0.827288	0.00801314490791	Protective
ADC	0.665347	0.492317	0.899191	0.00801477700427	Protective
ZNF846	0.591448	0.401142	0.872038	0.00802153076686	Protective
VPREB3	0.83146	0.725397	0.953031	0.00802751716971	Protective
KXD1	2.19596	1.22742	3.92876	0.00803963	Risk
REV3L	0.578751	0.38623	0.867236	0.00804277237459	Protective
YWHAG	2.17796	1.22419	3.87482	0.00809386917395	Risk
ST6GALNAC6	0.555742	0.359776	0.858448	0.00809839493992	Protective
OPA1	2.29552	1.24078	4.24685	0.00811473538724	Risk
GPN1	2.23955	1.2326	4.06909	0.00813617334965	Risk
LCOR	0.588158	0.396943	0.871486	0.00815413237872	Protective
FAM160B1	0.477086	0.275728	0.825492	0.00815669076037	Protective
GTF2IP1	0.609546	0.422351	0.879709	0.00817736535186	Protective
PAQR4	1.34757	1.08026	1.68104	0.00818631962311	Risk
RHBDF2	1.53198	1.1167	2.10169	0.00818945076147	Risk
GTF2B	0.427552	0.227707	0.802789	0.00820944720672	Protective
NEK8	0.602569	0.413864	0.877317	0.00822139499093	Protective
QRICH1	0.378555	0.184171	0.778102	0.00823016019449	Protective
HEIH	0.477926	0.276384	0.826434	0.00823693827624	Protective
ZFX	0.548357	0.351131	0.856362	0.00824802	Protective
CYFIP1	2.49579	1.26622	4.91933	0.00824834096683	Risk
LIN7A	0.833893	0.72869	0.954285	0.00828959891676	Protective
ECT2	1.45428	1.10126	1.92047	0.00829336941309	Risk
SIRPA	1.53867	1.11734	2.1189	0.00830144872356	Risk
PLTP	1.38886	1.08819	1.77259	0.00831522707723	Risk
ADAP2	1.58037	1.12491	2.22025	0.00832540673176	Risk
CXADR	1.30383	1.0706	1.58788	0.00833090337121	Risk
TOE1	0.489967	0.288296	0.832712	0.00837647183567	Protective
FNBP4	0.523833	0.323917	0.847133	0.00837902945683	Protective
ZKSCAN8	0.576754	0.383092	0.868315	0.00837963002089	Protective
MRPS12	1.7346	1.15177	2.61236	0.00838207129225	Risk
ZNF783	0.591837	0.400719	0.874106	0.00838360826685	Protective
GTSE1	1.32025	1.07381	1.62324	0.00840000992503	Risk
TXNRD1	1.67459	1.14129	2.45711	0.00840075323589	Risk
ZNF549	0.68693	0.519529	0.908271	0.00841121545882	Protective
COQ3	1.6693	1.14025	2.44382	0.0084168	Risk
PNKP	1.98142	1.19125	3.29572	0.00843664533255	Risk
ARRDC2	0.605733	0.417115	0.879642	0.00844661	Protective
TMEM41A	2.11479	1.21111	3.69274	0.00845216193805	Risk
ATP1A1	1.66221	1.13862	2.42657	0.00847608	Risk
ZNF830	0.482301	0.280243	0.830046	0.00847758206746	Protective
CD79A	0.863253	0.773723	0.963143	0.00848399132111	Protective
EMR2	1.38838	1.0874	1.77267	0.00848656633974	Risk
CYP20A1	0.461357	0.259307	0.820842	0.00849942103624	Protective
CEBPG	1.82917	1.1666	2.86804	0.00850159	Risk
INPP4B	0.787459	0.659013	0.94094	0.00853817	Protective
LMAN2	1.77122	1.15668	2.71226	0.00855194003804	Risk
TBC1D7	1.64426	1.13494	2.38214	0.00855841435789	Risk
RNF187	1.89897	1.17707	3.06361	0.00858819078453	Risk
PPARD	1.78879	1.1593	2.76009	0.00859056916041	Risk
NDUFB2	2.00971	1.19412	3.38236	0.00859138237655	Risk
STAB1	1.44399	1.09782	1.89932	0.00860542965402	Risk
SLC43A3	1.53054	1.11415	2.10254	0.00860903492345	Risk
OS9	2.30473	1.23538	4.29973	0.00868165578468	Risk
PRICKLE2	0.740617	0.5918	0.926855	0.00869916263099	Protective
NUDT8	1.22826	1.05335	1.43222	0.00871518151777	Risk
ARMC6	1.93635	1.18175	3.1728	0.00872161304205	Risk
PDDC1	0.567459	0.371568	0.866623	0.00872690282145	Protective
C1orf226	0.820926	0.708334	0.951416	0.00875002624968	Protective
DZIP3	0.601302	0.41108	0.879546	0.00875629184807	Protective
LRRC17	0.838326	0.734697	0.956572	0.00880688593435	Protective
MED12	0.442686	0.240573	0.8146	0.00881872863458	Protective
STX18	0.451932	0.249419	0.818873	0.00882212797709	Protective
UAP1	1.58882	1.12351	2.24684	0.00882859433742	Risk
ERP27	0.832867	0.726318	0.955047	0.00883106459617	Protective
FHOD1	1.74861	1.15086	2.65683	0.00883667	Risk
AK025726	0.622574	0.436599	0.887767	0.00885755044825	Protective
IKZF4	0.507656	0.30554	0.84347	0.00886776847698	Protective
PALM	0.785306	0.655281	0.941131	0.00887260793555	Protective
GMDS-AS1	0.637602	0.455122	0.893247	0.0088902	Protective
RAPGEFL1	0.752811	0.60856	0.931255	0.00889157322061	Protective
CYBB	1.35637	1.0794	1.70443	0.00890862522261	Risk
PSMA7	1.65435	1.13445	2.41251	0.00891388735142	Risk
LOC101054525	0.877319	0.79533	0.967761	0.00893343	Protective
PARP11	0.5784	0.383643	0.872027	0.00895714281774	Protective
HUS1	2.14612	1.21014	3.80605	0.00898945108554	Risk
INPP5B	0.533186	0.332631	0.854664	0.00899298	Protective
KLHL28	0.540855	0.341043	0.857735	0.00899604678556	Protective
BBS1	0.665352	0.490089	0.903292	0.00900138984112	Protective
HCK	1.38111	1.08388	1.75985	0.00901815539928	Risk
LYPLAL1	1.67817	1.13782	2.47513	0.00902288562572	Risk
AK097288	0.626659	0.441238	0.889997	0.00902678404404	Protective
DCAF5	0.468004	0.264667	0.827559	0.00903344288886	Protective
RLN2	0.830099	0.721787	0.954664	0.0090448	Protective
SLIT2	0.762158	0.621552	0.934571	0.00904632933113	Protective
LRSAM1	0.515099	0.312969	0.847775	0.00906564121725	Protective
TGFBI	1.32984	1.0733	1.6477	0.00913880731788	Risk
CELSR2	0.798826	0.674517	0.946045	0.00925052454776	Protective
ATP5O	2.22334	1.21797	4.05859	0.00926420136564	Risk
KPNA4	2.40864	1.24226	4.67015	0.00926509740879	Risk
SPIN3	0.606187	0.415687	0.883988	0.00930582921881	Protective
IGFBP4	0.745661	0.597626	0.930367	0.00934462	Protective
PDGFD	0.767599	0.628807	0.937025	0.00934465187983	Protective
ZBTB7A	0.490895	0.286997	0.839653	0.00937351681402	Protective
SHKBP1	2.03778	1.19097	3.4867	0.00938449	Risk
FCGR2B	1.37596	1.08149	1.75062	0.00938883246179	Risk
HECTD2	0.652331	0.472543	0.900523	0.00940677	Protective
MXD4	0.575995	0.37981	0.873516	0.00941964871262	Protective
PDE1A	0.742654	0.593214	0.92974	0.00944610452306	Protective
CD300C	1.42409	1.09038	1.85994	0.00945734298975	Risk
ADAM8	1.28789	1.06385	1.5591	0.00946657186114	Risk
MKL2	0.692706	0.524925	0.914113	0.00947105734503	Protective
LTB	0.833181	0.725871	0.956356	0.00947808766523	Protective
ZFYVE26	0.486227	0.281914	0.838612	0.00951855388165	Protective
C16orf95	1.60756	1.12281	2.3016	0.00952687002325	Risk
EFCAB4B	0.765193	0.62496	0.936892	0.00956715068251	Protective
NTPCR	1.66124	1.13127	2.43946	0.00962071492696	Risk
GJA1	0.816752	0.700719	0.952	0.00962087904074	Protective
PSAP	1.73209	1.14276	2.62535	0.00962904070673	Risk
MDM1	0.560634	0.36165	0.869103	0.00967634044971	Protective
SYBU	0.830899	0.722099	0.956093	0.00968152491335	Protective
LOC389033	0.904766	0.838698	0.976039	0.00968527536494	Protective
TAF12	0.412934	0.211242	0.807199	0.00970232835106	Protective
RBM39	0.460842	0.2562	0.828946	0.00970276	Protective
ABCD1	1.49811	1.1027	2.0353	0.00973213662788	Risk
SLC45A1	0.720949	0.562516	0.924005	0.0097596	Protective
AX810705	0.905797	0.840303	0.976396	0.00977284023539	Protective
TCF4	0.70541	0.541325	0.919232	0.00978310579493	Protective
AP2M1	2.24099	1.21484	4.13389	0.00979706064073	Risk
SH3GLB2	0.613905	0.423845	0.88919	0.00984287316033	Protective
SYNCRIP	2.15239	1.20259	3.85235	0.00984851061357	Risk
KIAA0319L	0.621674	0.433293	0.891956	0.00985901504024	Protective
ANKRD50	0.676069	0.502162	0.910203	0.00987737510379	Protective
STAT5A	0.657612	0.478241	0.904258	0.00990072185211	Protective
FAM188B	1.44754	1.09285	1.91734	0.00990577873432	Risk
SUN1	1.97586	1.17734	3.31599	0.00993834349206	Risk
ADAMTS10	0.711001	0.548577	0.921517	0.00994729	Protective
R3HDM2	0.472156	0.266849	0.835421	0.00994892584364	Protective
IP6K1	0.460993	0.255805	0.830768	0.00996755705716	Protective
ZNF287	0.636401	0.451279	0.897464	0.00997207359663	Protective
RPA3	1.71836	1.13831	2.59398	0.00998106346459	Risk
BC067230	0.534687	0.332093	0.860874	0.00998184268612	Protective
SSBP1	2.18493	1.20546	3.96025	0.01000102957963	Risk
LONRF2	0.815275	0.697926	0.952354	0.01000576321776	Protective
ABT1	2.12888	1.19776	3.78384	0.01002672857886	Risk
SFXN2	0.759408	0.615841	0.936444	0.01004866377827	Protective
SPIN1	0.522852	0.319095	0.856715	0.01005931848756	Protective
PARM1	0.743645	0.59346	0.931836	0.0100728	Protective
LAD1	1.21503	1.04751	1.40935	0.01007780679469	Risk
MAP1B	1.37061	1.07793	1.74277	0.0101051	Risk
NUP155	1.86128	1.15931	2.9883	0.01011349536454	Risk
DNMBP	0.730302	0.574734	0.92798	0.01012554415776	Protective
FGD5-AS1	0.479236	0.273546	0.839592	0.01013761009311	Protective
SCLY	0.515375	0.310895	0.854346	0.01015837725942	Protective
CDKL1	0.633245	0.446786	0.89752	0.01024205350473	Protective
MBLAC2	0.604531	0.411653	0.887781	0.01025619490545	Protective
TRPV6	1.15318	1.03424	1.2858	0.01028305007239	Risk
CT62	0.835044	0.727572	0.958392	0.01033075340854	Protective
TTLL3	0.672709	0.496779	0.910943	0.01037771407895	Protective
HDHD2	0.577866	0.379879	0.879041	0.0103973	Protective
UBXN10	0.831436	0.721936	0.957545	0.0104052	Protective
TACC1	0.693958	0.524698	0.917819	0.01043340129595	Protective
AKAP12	0.782192	0.648109	0.944015	0.0104531	Protective
MLLT11	1.3414	1.07129	1.67961	0.01045978108064	Risk
GAA	1.73372	1.13769	2.64202	0.01046310847708	Risk
ZNF396	0.711335	0.547913	0.923499	0.01054136315955	Protective
CR936830	0.71201	0.548677	0.923965	0.01062587210114	Protective
EIF4E3	0.65169	0.469209	0.905139	0.01063153614323	Protective
FMO1	0.815478	0.697328	0.953647	0.01064046110628	Protective
RBPMS	0.729697	0.572947	0.929333	0.01065152906137	Protective
PNRC2	0.556428	0.354801	0.872637	0.01066885873179	Protective
CAPG	1.55346	1.10777	2.17848	0.01067435042189	Risk
GGT1	1.20377	1.04395	1.38805	0.0107171	Risk
VDAC1	1.89465	1.15961	3.09561	0.01073745917215	Risk
CLEC3B	0.771155	0.631572	0.941587	0.010749	Protective
PHKA2	0.4974	0.290826	0.850702	0.01075728475176	Protective
CDA	1.40534	1.08196	1.82538	0.01076140014491	Risk
KIF13A	0.605081	0.411245	0.890278	0.01077746741485	Protective
LMOD1	0.789373	0.658145	0.946768	0.01078334240984	Protective
ZMYM6	0.448487	0.242102	0.830807	0.01079600886349	Protective
PTBP1	2.80361	1.26895	6.19426	0.01080695653742	Risk
WNK4	0.873823	0.787683	0.969384	0.01085917464205	Protective
CCR2	0.799166	0.672488	0.949706	0.01089679567214	Protective
NEK3	0.604338	0.409975	0.890846	0.0109664	Protective
PES1	1.91025	1.15991	3.14597	0.01099853700801	Risk
INO80	0.407114	0.203633	0.813927	0.01100813692868	Protective
TTC30B	0.634953	0.447363	0.901204	0.01101612427564	Protective
MRPL2	1.89874	1.15786	3.11371	0.01106126993396	Risk
CDK6	1.33975	1.06912	1.6789	0.01107101246728	Risk
PAQR7	0.605003	0.41052	0.891623	0.01109442482012	Protective
KIFC1	1.29488	1.06059	1.58094	0.0111623	Risk
TCRBV3S1	0.869069	0.779793	0.968565	0.01116497098674	Protective
CCT7	2.17796	1.19358	3.97418	0.01119211252206	Risk
HAUS3	0.525337	0.319462	0.863885	0.01119643571033	Protective
GPR56	1.47243	1.09185	1.98566	0.01121522280592	Risk
MDM2	0.576764	0.376934	0.882532	0.01122070404802	Protective
FARP2	0.540762	0.336228	0.869716	0.01122192370825	Protective
NDUFA6	1.9075	1.15779	3.14269	0.01124113207201	Risk
PTPLB	1.67134	1.12348	2.48635	0.01126061010087	Risk
SDCBP2	1.31295	1.06363	1.62071	0.01127279194434	Risk
HIF1AN	0.491302	0.283522	0.851353	0.01128691922258	Protective
LOC728769	0.602295	0.406853	0.891622	0.01130627198967	Protective
CNOT6L	0.524511	0.318338	0.864212	0.01131645989668	Protective
YARS	1.79523	1.14147	2.82342	0.01132003915443	Risk
ZNF622	1.84948	1.14909	2.97678	0.01133343453627	Risk
VTI1B	0.419502	0.214132	0.821838	0.01134670303509	Protective
HPCAL1	1.67548	1.12355	2.49855	0.01136315863527	Risk
PRMT9	0.496616	0.288795	0.853987	0.01138562444567	Protective
LILRB4	1.29771	1.06048	1.588	0.01140385242787	Risk
STAT5B	0.63652	0.44855	0.903262	0.01141554974024	Protective
METRNL	1.52073	1.099	2.10429	0.01141726910284	Risk
TRO	0.719712	0.557799	0.928623	0.01142345471122	Protective
CISH	0.766554	0.623823	0.941942	0.01144127150615	Protective
LOC646626	0.588784	0.390539	0.887661	0.01144264576194	Protective
AL355711	0.70697	0.540298	0.925056	0.01147663394043	Protective
YEATS2	1.70897	1.12787	2.58947	0.0114876	Risk
C1orf109	0.521679	0.314958	0.86408	0.01149139400061	Protective
SCN4B	0.781403	0.645357	0.946128	0.01149212631504	Protective
CCDC122	0.672659	0.494584	0.914849	0.01149839117315	Protective
KDM4B	0.74077	0.586955	0.934893	0.01150711650499	Protective
PPP3CB	0.435336	0.228393	0.829786	0.01150734246935	Protective
RSAD1	0.551805	0.34788	0.875271	0.01153877267527	Protective
HK3	1.2194	1.0454	1.42238	0.01156638959946	Risk
FAM98A	2.04098	1.17303	3.55115	0.01157823765068	Risk
FOXM1	1.23963	1.04923	1.46459	0.01157848704683	Risk
CD163L1	1.30545	1.06144	1.60555	0.01157861037602	Risk
PIR	1.3206	1.06404	1.63903	0.01163126633804	Risk
LAMP1	1.72319	1.12911	2.62982	0.01163680300682	Risk
SAP30	1.50102	1.09484	2.0579	0.011643	Risk
NR3C1	0.660841	0.478972	0.911767	0.01165450303718	Protective
CTSO	0.614677	0.421098	0.897244	0.01167466287158	Protective
ATP6AP1L	0.666942	0.48682	0.913708	0.01167508079006	Protective
C9orf116	0.804887	0.679876	0.952885	0.01172360747932	Protective
DQ581677	1.09784	1.02097	1.1805	0.0117272	Risk
WNK1	0.500295	0.291936	0.857363	0.01173828451037	Protective
MTFR1L	0.461799	0.253183	0.842309	0.01174914123213	Protective
ELL2	1.43264	1.08283	1.89545	0.01183071626221	Risk
YPEL3	0.627	0.435888	0.901904	0.01185023351321	Protective
ID2	0.60533	0.409438	0.894945	0.01185759765281	Protective
BRI3	1.74035	1.12983	2.68075	0.01194449260535	Risk
TMEM255B	1.54678	1.10065	2.17376	0.01199417508806	Risk
TSHZ2	0.779684	0.642087	0.946769	0.01200062785966	Protective
NDUFB6	1.97556	1.16073	3.36238	0.01209711935019	Risk
ACN9	1.44524	1.08394	1.92697	0.01210271802891	Risk
SYNRG	0.5408	0.33457	0.874151	0.01210953960394	Protective
CCDC97	0.442188	0.233745	0.836512	0.01211437865476	Protective
SDR16C5	0.879304	0.795227	0.97227	0.01212859566556	Protective
IFT140	0.728758	0.569125	0.933168	0.01213145577863	Protective
ZNF34	0.557103	0.35269	0.87999	0.01213938356242	Protective
ATG16L1	0.593266	0.394484	0.892214	0.01215012020483	Protective
PRPF38B	0.456918	0.24771	0.842819	0.01216262675593	Protective
MEIS3	0.768043	0.624836	0.944071	0.01218948026878	Protective
IL33	0.853896	0.754687	0.966148	0.01219419374263	Protective
PLIN4	0.888409	0.80989	0.974541	0.01220372192055	Protective
ATP6V1F	1.97186	1.15944	3.35354	0.01221146378508	Risk
TSEN2	0.561306	0.357298	0.881798	0.01221771896147	Protective
SLC35E2	0.700279	0.52993	0.925389	0.01223805418392	Protective
CD69	0.792054	0.659996	0.950536	0.01224209662256	Protective
ZXDB	0.608178	0.412149	0.897445	0.0122441	Protective
RIPK3	0.748351	0.596476	0.938895	0.01225325734065	Protective
SIGLEC1	1.27907	1.05499	1.55074	0.01225548652305	Risk
ST8SIA6-AS1	1.10746	1.02243	1.19957	0.0122715	Risk
CNN1	0.830636	0.718274	0.960576	0.01233653377978	Protective
AKT3	0.728921	0.569015	0.933765	0.0123385	Protective
BABAM1	2.07219	1.17081	3.66751	0.01237227366066	Risk
FAM35A	0.509973	0.300805	0.864588	0.01241303641898	Protective
CCL2	1.2412	1.04775	1.47036	0.0124343	Risk
PYGB	1.53708	1.09715	2.1534	0.01245678173838	Risk
IL1B	1.23617	1.04679	1.45981	0.01245787106846	Risk
DKFZp686O16217	0.905737	0.838057	0.978882	0.01246731648113	Protective
RAMP1	0.812016	0.689612	0.956146	0.01249327830623	Protective
PPP1R16B	0.773121	0.631655	0.946269	0.01257470320858	Protective
SIDT2	0.577289	0.374892	0.888957	0.01261851188719	Protective
SRP14	0.443332	0.233951	0.840105	0.01262449954122	Protective
AURKB	1.23826	1.04678	1.46475	0.01265082305843	Risk
PRKCSH	2.05972	1.16701	3.63533	0.01267530399919	Risk
REV1	0.453303	0.243322	0.844493	0.01268824580404	Protective
PCDH18	0.780505	0.642275	0.948485	0.01271113827839	Protective
UQCRC1	2.03785	1.16405	3.56758	0.01271592366861	Risk
GPX4	0.573092	0.369843	0.888037	0.01272584719882	Protective
ASCC2	2.1833	1.1811	4.03591	0.0127405	Risk
TRIM45	0.744312	0.589952	0.939059	0.01276727190102	Protective
OSCP1	0.718312	0.553613	0.932008	0.0127787	Protective
MAEA	0.416238	0.20877	0.829879	0.01278741939736	Protective
UBXN11	0.664987	0.482283	0.916906	0.01280105642122	Protective
MRPS22	2.25757	1.18889	4.2869	0.01281863790093	Risk
KCTD18	0.464413	0.253837	0.849674	0.01282794843431	Protective
ADM2	1.30991	1.05893	1.62039	0.01286244920974	Risk
SLC35D2	0.539035	0.331205	0.877277	0.01288750013156	Protective
VWA1	1.59043	1.10325	2.29274	0.01290010430723	Risk
PIEZO2	0.813477	0.691307	0.957237	0.01290629630127	Protective
PGAM1	1.94607	1.15135	3.28933	0.01290970697215	Risk
HSPBP1	1.83543	1.13712	2.96257	0.0129184	Risk
HIC1	0.746716	0.593112	0.940101	0.01293208882124	Protective
SOCS2	0.81478	0.693249	0.957617	0.0129388	Protective
CCDC74B	0.832366	0.720214	0.961984	0.01296061664481	Protective
SYNJ2BP	0.583494	0.38149	0.892463	0.01296606023698	Protective
MIR3180-5	0.856497	0.757966	0.967837	0.01298253339731	Protective
GPC3	0.854362	0.754585	0.967333	0.01298646968475	Protective
D2HGDH	0.65167	0.464762	0.913744	0.01302754708878	Protective
DCAF16	0.634521	0.443056	0.908727	0.01305585716537	Protective
MKKS	1.90565	1.14518	3.17113	0.01307651810102	Risk
SNRNP40	0.474243	0.263072	0.854922	0.01309059939312	Protective
AL832384	0.711603	0.543901	0.931013	0.01309172343901	Protective
FAM208A	0.509141	0.298694	0.867858	0.01310764538139	Protective
HMCN1	0.812578	0.689668	0.957392	0.01312592075793	Protective
BC043620	0.548096	0.340781	0.881533	0.01313744500396	Protective
MBD4	2.14033	1.17284	3.90592	0.01315944522062	Risk
RALGPS2	0.784597	0.647652	0.950499	0.01318608991697	Protective
LONP1	1.92486	1.14675	3.23095	0.01320663958363	Risk
HMGB3	1.25915	1.04936	1.51089	0.01321028285062	Risk
BEX1	0.893575	0.817481	0.976752	0.0132138	Protective
ZNF320	0.607648	0.409727	0.901173	0.01323191774187	Protective
HSPE1	1.62379	1.10653	2.38285	0.01323842795235	Risk
C19orf10	1.85522	1.13742	3.02602	0.0132943	Risk
RNF8	1.91594	1.14492	3.20619	0.01331894402066	Risk
RBMS3	0.758461	0.609231	0.944246	0.01339197254375	Protective
ZNF767P	0.719541	0.554295	0.934051	0.01341886144674	Protective
ING5	0.551041	0.343511	0.883947	0.01345230435717	Protective
LINC00993	0.910349	0.844999	0.980752	0.01346131857595	Protective
STK38L	1.53605	1.09284	2.15901	0.01347115377662	Risk
SPINT2	1.49763	1.08706	2.06326	0.01348787025993	Risk
GRK4	0.52911	0.319323	0.876721	0.0134889	Protective
KATNB1	1.7595	1.12381	2.75476	0.0135001	Risk
AF086186	1.22015	1.04193	1.42884	0.01351805026684	Risk
GALNT11	0.555425	0.348297	0.885728	0.01352661711557	Protective
ZNF354B	0.604626	0.405525	0.901481	0.01355321779591	Protective
ZEB1	0.731962	0.571341	0.937739	0.0135671	Protective
GRN	1.65005	1.10862	2.4559	0.01358050345394	Risk
CAB39L	0.733007	0.572773	0.938068	0.01358852404129	Protective
PRIM2	1.68719	1.11352	2.55641	0.01362060129796	Risk
TUBA1C	1.57272	1.09751	2.25371	0.01363122467469	Risk
INPP5F	0.554715	0.347315	0.885963	0.01363256121407	Protective
MAP3K4	0.520387	0.30958	0.874744	0.01370160264106	Protective
ID1	0.749193	0.595378	0.942746	0.01378487640341	Protective
SNX19	0.510597	0.299052	0.871788	0.01379113010755	Protective
NELFE	2.09651	1.1631	3.77898	0.01379435023345	Risk
ZNF135	0.778871	0.638365	0.950303	0.0138096	Protective
SLC16A6	0.834363	0.722331	0.96377	0.01383210716637	Protective
EGFLAM	0.735933	0.57648	0.93949	0.01385728673231	Protective
MARVELD3	1.42703	1.07506	1.89424	0.01386098369612	Risk
CSTB	1.4373	1.07657	1.91891	0.01387902896352	Risk
DOCK1	0.64883	0.459691	0.91579	0.0138831	Protective
PAFAH2	0.566962	0.360733	0.891091	0.01390152304385	Protective
HLF	0.824027	0.706241	0.961457	0.0139168	Protective
SPOPL	0.667831	0.484066	0.92136	0.01394051486125	Protective
MSANTD3	1.61864	1.10263	2.37613	0.0139422	Risk
RSPH1	0.819381	0.699059	0.960414	0.01395419862544	Protective
MGP	0.858864	0.760753	0.969627	0.01395846818412	Protective
NCBP2-AS2	1.81609	1.12832	2.92309	0.01400548752466	Risk
TMEM88	0.746042	0.590558	0.942461	0.01401295307388	Protective
AK055601	0.566113	0.35952	0.891421	0.01404378806929	Protective
RIN2	1.63384	1.1042	2.41753	0.01405632925986	Risk
ABCF1	2.02919	1.15358	3.56943	0.01405792118976	Risk
TOMM22	2.01576	1.15196	3.52726	0.0140686	Risk
CHCHD10	1.59878	1.09931	2.32518	0.01407190671504	Risk
HDAC7	0.511037	0.298921	0.873672	0.01414532478536	Protective
SERPINA11	0.896381	0.821357	0.978258	0.01417190691935	Protective
WDR81	0.515082	0.303113	0.875281	0.01419150404319	Protective
EVI5	0.507324	0.294932	0.872668	0.01420185365539	Protective
ADORA3	1.38189	1.06703	1.78965	0.01421720272043	Risk
CCRL2	1.38049	1.06653	1.78688	0.01431739961874	Risk
SIN3A	0.518637	0.306665	0.877126	0.01432559271442	Protective
TMCO6	0.558343	0.35015	0.890326	0.0143685	Protective
TIRAP	0.537593	0.327059	0.883651	0.01437317510877	Protective
NUCB1	2.35635	1.18596	4.68177	0.01441122810885	Risk
LRRK2	0.714915	0.546386	0.935425	0.01441943358563	Protective
CACYBP	1.68091	1.10876	2.5483	0.01443451109788	Risk
XKR8	0.476473	0.262982	0.863279	0.01449349865562	Protective
CLDN11	0.829992	0.714781	0.963773	0.01452876008211	Protective
MED24	0.601632	0.400237	0.904367	0.01455246000285	Protective
CCDC69	0.763749	0.615255	0.948082	0.01455425001651	Protective
CCDC103	0.770885	0.625595	0.949919	0.01459969340299	Protective
DPF2	0.458493	0.245169	0.857432	0.01462460899021	Protective
ZFC3H1	0.527925	0.316042	0.881859	0.01467798300314	Protective
NELL2	0.866058	0.771587	0.972096	0.01467914851838	Protective
CD44	1.43496	1.07365	1.91786	0.01468332039196	Risk
FOXO1	0.710979	0.540431	0.935346	0.01478553704063	Protective
GLT8D1	0.495421	0.281616	0.87155	0.01480978814806	Protective
NMD3	2.13162	1.15959	3.91845	0.01482479287205	Risk
HMGA1	1.38637	1.06597	1.80307	0.01483366695105	Risk
CD86	1.37365	1.06403	1.77335	0.01484103233863	Risk
CCDC170	0.825419	0.707331	0.963221	0.01486454990655	Protective
C8orf4	0.838924	0.728334	0.966307	0.01488477977654	Protective
ABHD12	1.48895	1.08074	2.05133	0.01489532569129	Risk
MESDC2	2.36909	1.18318	4.74364	0.01489982567689	Risk
MIER3	0.595182	0.391944	0.903806	0.01491295617468	Protective
ZNF440	0.618726	0.420267	0.910901	0.0149797	Protective
MOV10	0.539565	0.328224	0.886988	0.01498128106296	Protective
CRELD2	1.55482	1.0895	2.21888	0.0150004	Risk
ACSL1	1.30613	1.05322	1.61978	0.01500999588786	Risk
VHL	0.503156	0.289272	0.875184	0.01501443974413	Protective
LRCH1	0.612419	0.412483	0.909265	0.01502934702136	Protective
KCNK15	0.86248	0.765528	0.971711	0.01503072238866	Protective
NBPF3	0.66804	0.482553	0.924826	0.01506212076743	Protective
MYL5	0.692437	0.514828	0.93132	0.01507858111234	Protective
SNORD58C	0.924171	0.867219	0.984864	0.01510120941128	Protective
CDKN1A	1.43081	1.07172	1.91021	0.01510923469408	Risk
ZNF436	0.623859	0.426351	0.912864	0.01512480339947	Protective
EPS8	0.661772	0.474282	0.92338	0.01514131557865	Protective
GALK1	1.55802	1.08932	2.22838	0.01516013378207	Risk
SNX29	0.562554	0.353615	0.894947	0.01516074100717	Protective
CDC34	1.83165	1.12346	2.98624	0.01523454574435	Risk
DNAJB1	1.74727	1.1133	2.74225	0.01523761635516	Risk
CCL3	1.24928	1.04372	1.49532	0.01524522874649	Risk
PRRT1	0.737194	0.576246	0.943095	0.01525981699005	Protective
CHMP1B	1.99701	1.14211	3.49181	0.0152641	Risk
ACE	1.38376	1.06428	1.79913	0.01530391278506	Risk
ARRB1	0.70447	0.53076	0.935034	0.01531043038197	Protective
MANF	1.65236	1.10097	2.4799	0.01533716439458	Risk
FAM50B	0.733837	0.571401	0.942448	0.01533772628455	Protective
TLK1	0.551118	0.340357	0.892389	0.01539423728567	Protective
PTPN4	0.539337	0.327306	0.888723	0.0153967	Protective
C14orf159	0.639935	0.445948	0.918308	0.01541637534679	Protective
RAD17	0.51948	0.305764	0.882574	0.01544028902076	Protective
PPIL1	1.76381	1.11411	2.79238	0.01547928954536	Risk
IGFALS	0.863995	0.767537	0.972576	0.01550570976874	Protective
TRMU	1.6925	1.10525	2.59177	0.0155104	Risk
EBF1	0.747679	0.59076	0.946278	0.0155459	Protective
SLC24A1	0.62668	0.429171	0.915086	0.01554740634143	Protective
RAB30	0.780253	0.638161	0.953983	0.01555207577704	Protective
NAA10	1.79637	1.11758	2.88743	0.015561	Risk
LRRC37BP1	0.60267	0.399833	0.908407	0.01557100330564	Protective
TXN	1.66001	1.10084	2.50323	0.01559030971212	Risk
SATB1	0.74318	0.584271	0.945308	0.01559787123505	Protective
RGS16	1.31113	1.05266	1.63307	0.01560282304651	Risk
GPN3	2.1034	1.15124	3.84306	0.0156078	Risk
PRKRIP1	0.470496	0.255346	0.866926	0.01560966000051	Protective
SHB	1.61918	1.09548	2.39322	0.01563049012875	Risk
ZC3H14	0.523437	0.309691	0.884708	0.01563113069849	Protective
ESR1	0.899417	0.825337	0.980147	0.01564010431626	Protective
SSPN	0.75669	0.603578	0.948642	0.01564698258981	Protective
APBB3	0.669089	0.482918	0.927031	0.01571810576028	Protective
RBMXL1	0.527475	0.313858	0.886486	0.01574201312692	Protective
XPC	0.529131	0.315626	0.887061	0.0157537	Protective
SDPR	0.820928	0.699419	0.963548	0.01576498363708	Protective
PRPF39	0.586289	0.380049	0.904449	0.01577768316264	Protective
CROCCP2	0.698547	0.522023	0.934762	0.0157831	Protective
TCP11L2	0.617485	0.417403	0.913476	0.01582594712636	Protective
TNKS2	0.580863	0.373597	0.903119	0.01584347697418	Protective
C17orf58	0.736714	0.574702	0.944399	0.01588983694036	Protective
IGF1	0.831163	0.715153	0.96599	0.01590463991804	Protective
ZC3H18	1.97251	1.13547	3.4266	0.01591542251538	Risk
PPP1CB	1.95865	1.13373	3.38382	0.01595741284036	Risk
CLPSL1	1.14951	1.02632	1.28748	0.01598928636751	Risk
RPL22L1	1.42962	1.06878	1.9123	0.01603451064557	Risk
BCL2L12	1.64967	1.09759	2.47945	0.01604607672915	Risk
VPS4A	1.93451	1.13057	3.31014	0.0160506	Risk
TFG	1.99993	1.13754	3.51608	0.01605693305056	Risk
SIDT1	0.818756	0.695723	0.963547	0.01608720229196	Protective
SOCS2-AS1	0.829465	0.712283	0.965925	0.01612327422653	Protective
CAMLG	0.533932	0.32024	0.890217	0.01613583766541	Protective
EFCAB14	0.516056	0.301042	0.884642	0.01614146948499	Protective
CMYA5	0.800097	0.667148	0.959539	0.01615322463888	Protective
USP20	0.476647	0.260576	0.871885	0.01617564482994	Protective
BAIAP3	0.842909	0.733282	0.968926	0.01621552105218	Protective
TRAF6	0.479688	0.263538	0.873123	0.01621858832407	Protective
ATP5G3	1.85513	1.12089	3.07032	0.01622043519838	Risk
MED13L	0.679627	0.496024	0.93119	0.01623166778194	Protective
LYN	1.41054	1.06554	1.86723	0.01623523592994	Risk
LSG1	2.06542	1.14295	3.73241	0.01628256173609	Risk
ITFG1	1.58873	1.08882	2.31815	0.01633230015917	Risk
LOC100506621	0.841327	0.730658	0.968757	0.01634702658633	Protective
FLT3LG	0.67823	0.493997	0.93117	0.01635289986541	Protective
IGIP	0.674051	0.488464	0.93015	0.01636577973326	Protective
TMEM101	0.74259	0.582404	0.946835	0.0163668	Protective
RPL26L1	1.84012	1.11844	3.02749	0.01636907328532	Risk
SLCO2B1	1.42454	1.06708	1.90175	0.01637634901306	Risk
APRT	1.62449	1.0931	2.4142	0.01638006792268	Risk
CILP	0.869958	0.776399	0.974791	0.01640464677193	Protective
CALU	1.62528	1.09302	2.41673	0.01642430062457	Risk
TBC1D9	0.838039	0.725394	0.968177	0.01643668294794	Protective
GATA3-AS1	0.894123	0.815987	0.979741	0.01645626223698	Protective
SRPRB	1.77045	1.11012	2.82357	0.01645683121728	Risk
PLA2G10	0.835616	0.721568	0.967691	0.01645694359037	Protective
MEG3	0.806409	0.676388	0.961422	0.01646167634034	Protective
NR2F2	0.750927	0.5942	0.948992	0.01647084211403	Protective
MSRB3	0.784987	0.644082	0.956717	0.01647093000287	Protective
SHCBP1	1.28433	1.04675	1.57583	0.01649463050783	Risk
C9orf41	0.560115	0.348751	0.899579	0.0164957	Protective
FGFR3	0.85873	0.758184	0.972608	0.01652528311707	Protective
ALDOC	1.24606	1.04091	1.49163	0.01653583771825	Risk
C5AR2	0.829596	0.712043	0.966558	0.01656335666143	Protective
NKAIN1	0.895362	0.817955	0.980094	0.01658358153958	Protective
ARHGEF10	0.653246	0.461073	0.925517	0.01660196866454	Protective
MTF2	0.510638	0.294631	0.885011	0.01660579773528	Protective
DQ586540	0.640696	0.444955	0.922546	0.01669494866157	Protective
KLHL18	2.02676	1.13646	3.61449	0.01669522255864	Risk
LINC00339	0.594316	0.388094	0.910118	0.01670628872615	Protective
INMT	0.810063	0.681698	0.9626	0.01671140064705	Protective
TNRC18P1	0.903654	0.831669	0.981869	0.01675786970542	Protective
TFF3	0.909947	0.842233	0.983105	0.01676413745386	Protective
DIAPH1	2.04142	1.13739	3.66399	0.01678623204353	Risk
ABCB9	1.33262	1.05316	1.68622	0.0167867	Risk
FAT4	0.760882	0.608189	0.951912	0.01679361243431	Protective
CCDC96	0.741552	0.580359	0.947517	0.01679946501298	Protective
KLHL20	0.505139	0.288597	0.884155	0.01680073433373	Protective
PARD6B	0.832282	0.715993	0.967457	0.01681107294664	Protective
CHURC1	0.512755	0.29649	0.886769	0.01685150798376	Protective
MMP16	0.814747	0.688709	0.963851	0.01687819100882	Protective
TRAPPC8	0.51443	0.298198	0.887458	0.0168899	Protective
PIH1D1	1.85495	1.11736	3.07943	0.01689225228081	Risk
FAM47E	0.833558	0.717892	0.967861	0.01691425874163	Protective
CLEC10A	0.851159	0.745711	0.971518	0.01693282393155	Protective
JC037840	0.953308	0.91662	0.991465	0.01693766618123	Protective
ZNF792	0.591673	0.384602	0.910234	0.01694383400256	Protective
ZAP70	0.805996	0.675221	0.962098	0.01695254708748	Protective
PTBP2	0.650161	0.456575	0.925828	0.01697275744486	Protective
NELFA	0.508594	0.291942	0.886023	0.01697522745681	Protective
FLVCR2	1.35062	1.05522	1.72872	0.0169975	Risk
ISOC2	1.80396	1.11104	2.92904	0.01704436445385	Risk
C6orf106	2.04605	1.13626	3.68429	0.01704961771257	Risk
TTC28	0.696306	0.517186	0.937462	0.01705226291155	Protective
TYROBP	1.38987	1.06036	1.82177	0.01710269165791	Risk
STOX1	0.815504	0.689625	0.964358	0.01711474301199	Protective
BCL2L11	0.602167	0.396809	0.913802	0.01714603816829	Protective
ABCD3	0.723109	0.553842	0.944107	0.01718713048475	Protective
DTD1	1.68573	1.09697	2.5905	0.01721161918584	Risk
MST1	0.751486	0.59398	0.950758	0.01727806576953	Protective
COX5A	1.87806	1.11765	3.15585	0.01731349811191	Risk
ACTN4	1.6844	1.09621	2.58818	0.01735416615613	Risk
NOS1AP	0.839457	0.726745	0.96965	0.01736325384093	Protective
ZNF75A	0.675815	0.489303	0.933422	0.01740135027106	Protective
NR2F1	0.82848	0.709435	0.967502	0.01743578905371	Protective
FAM175A	0.579347	0.369368	0.908695	0.01745960584671	Protective
GPR180	1.67061	1.09414	2.55079	0.01747195867894	Risk
CREB3L2	1.65487	1.09223	2.50733	0.01749507995568	Risk
AK092048	0.77155	0.62295	0.955599	0.01749903460329	Protective
PSAT1	1.15268	1.02517	1.29605	0.01752238411102	Risk
APOD	0.87659	0.786308	0.977239	0.0175419	Protective
ZNF606	0.677271	0.491024	0.934162	0.01754627185623	Protective
NKD2	0.821269	0.698061	0.966223	0.01758280750703	Protective
GET4	1.70743	1.09772	2.6558	0.01761523660709	Risk
RP11-983P16.4	0.763025	0.610293	0.95398	0.01762573054801	Protective
VPS11	0.496973	0.278934	0.885449	0.01765273045302	Protective
TREM2	1.36814	1.05604	1.77247	0.01765658597735	Risk
SLC7A1	1.52528	1.07617	2.16182	0.0176694	Risk
NISCH	0.544883	0.329894	0.899977	0.01771176998137	Protective
PTGDS	0.855063	0.751268	0.973198	0.01771981711459	Protective
VIMP	1.83668	1.11092	3.03656	0.01778677571798	Risk
Em:AC008101.5	1.79664	1.10654	2.91712	0.01781829254511	Risk
TBC1D24	1.48258	1.07023	2.05381	0.0178769	Risk
EHMT1	0.515407	0.297769	0.892117	0.01789500507823	Protective
CCNB2	1.25993	1.04053	1.5256	0.01793754072898	Risk
CCL4	1.24767	1.03864	1.49877	0.01802222576926	Risk
SUPT20H	0.573843	0.362064	0.909494	0.01809335851745	Protective
NMNAT1	0.563543	0.350252	0.906721	0.01810286249893	Protective
CTSL	1.34558	1.05177	1.72147	0.01819928364288	Risk
PLIN1	0.897721	0.820806	0.981843	0.01823025645429	Protective
ORC6	1.2602	1.0399	1.52717	0.01832042158965	Risk
IMPA2	1.31221	1.04703	1.64456	0.01832776872218	Risk
SDF2L1	1.5071	1.0718	2.1192	0.01834046419531	Risk
SURF4	2.09241	1.13278	3.86498	0.01836550136845	Risk
DTL	1.28685	1.04344	1.58703	0.01839915572167	Risk
MAP2K1	1.93482	1.11771	3.34929	0.01840184074059	Risk
PKN2	0.558003	0.343492	0.906477	0.01844308462445	Protective
LDB2	0.722342	0.55113	0.946743	0.01844998506837	Protective
BC050044	0.853954	0.748854	0.973804	0.01846717039507	Protective
ZBTB44	0.613576	0.408672	0.921218	0.01848695485552	Protective
LRP12	1.45019	1.0644	1.97581	0.01850077419039	Risk
ZNF385B	0.879411	0.790198	0.978696	0.01854575819649	Protective
ZBTB40	0.594106	0.385136	0.916462	0.01855216662213	Protective
BC032901	0.839037	0.724984	0.971033	0.01855856836006	Protective
VPS26B	0.505365	0.286301	0.892047	0.01857318221566	Protective
MEIS3P1	0.745934	0.584346	0.952205	0.01861615217339	Protective
SEMA3E	0.856196	0.752327	0.974405	0.01862714822543	Protective
EIF3K	1.84519	1.10757	3.07405	0.01865803332437	Risk
LONRF1	0.639473	0.440546	0.928224	0.01868654385079	Protective
HLA-DRB5	1.22558	1.03444	1.45204	0.01870563550932	Risk
LINC01089	0.728597	0.559523	0.948761	0.01875296336749	Protective
TP53BP1	0.55584	0.340597	0.907107	0.01876775587797	Protective
SMOX	1.35615	1.05186	1.74847	0.01877546894859	Risk
ANKRD49	0.543575	0.326895	0.903882	0.018801	Protective
FPR3	1.27299	1.04081	1.55696	0.01880999001444	Risk
PEX12	0.642071	0.443636	0.929266	0.01882947879101	Protective
ZNF818P	0.703125	0.524058	0.943378	0.01884246446872	Protective
CRIPT	1.98584	1.11984	3.52155	0.01891512607854	Risk
FLJ46906	1.30495	1.04486	1.62979	0.01893261121653	Risk
ZNF776	0.619247	0.414986	0.924046	0.0189368	Protective
BUB1B	1.30205	1.04429	1.62343	0.01902926550738	Risk
HOPX	0.758369	0.601818	0.955644	0.01904964004005	Protective
FGD3	0.806383	0.673606	0.965331	0.01906043431856	Protective
MRPL49	0.54463	0.327627	0.905364	0.01911069029523	Protective
RAB35	2.58005	1.16755	5.70139	0.01913551436133	Risk
BDH2	0.664022	0.471391	0.93537	0.01917248037168	Protective
SERINC4	0.622012	0.418046	0.925494	0.01918761081394	Protective
FAM222A	1.28046	1.04114	1.5748	0.0191885	Risk
KDM1B	1.72919	1.09334	2.73483	0.01920546256304	Risk
IDH2	1.35685	1.05089	1.75187	0.01924555682124	Risk
FSCN1	1.34908	1.0499	1.73352	0.01925109211924	Risk
ITGB2	1.31035	1.04491	1.64322	0.01926483617764	Risk
NAP1L5	0.731957	0.563631	0.950553	0.01926767966298	Protective
CDK16	1.67299	1.08718	2.57445	0.01927984634599	Risk
BBS5	0.642494	0.443501	0.930773	0.0193195	Protective
IL20RA	0.867548	0.770175	0.977231	0.01932814871615	Protective
SORBS1	0.792767	0.65258	0.96307	0.01933758168047	Protective
IL7R	0.837785	0.72229	0.971749	0.01935504863354	Protective
LILRB2	1.29849	1.04319	1.61627	0.01935964500412	Risk
DEGS1	1.36999	1.05227	1.78364	0.01936308406232	Risk
PSMB2	1.71906	1.09162	2.70713	0.01937086990175	Risk
TSTA3	1.4509	1.06204	1.98212	0.01938082901229	Risk
FAM111B	1.2733	1.03982	1.55919	0.01939778525722	Risk
TNFSF13	1.58385	1.07704	2.32914	0.01942999805755	Risk
RPL27A	0.54754	0.330387	0.90742	0.0194451	Protective
NDC80	1.27262	1.03963	1.55783	0.01945686288044	Risk
PDLIM1	1.30222	1.04344	1.62518	0.0194828	Risk
HMGCS1	1.45252	1.0619	1.98682	0.01950313465906	Risk
DSTNP2	0.615928	0.410109	0.92504	0.01951942633481	Protective
JAK2	0.663211	0.469841	0.936165	0.01954180679426	Protective
ASMTL	0.602488	0.39376	0.92186	0.01954901034102	Protective
PIKFYVE	0.529587	0.310594	0.902988	0.01955482304602	Protective
TMED7-TICAM2	1.69866	1.08873	2.65028	0.01956695059978	Risk
M87938	0.89706	0.818854	0.982735	0.01958627207922	Protective
TNFAIP8L1	0.608019	0.400317	0.923485	0.01963505021691	Protective
HEBP2	1.54211	1.07156	2.21928	0.01969608755299	Risk
HSPD1	1.53043	1.07026	2.18847	0.01969827685681	Risk
COPB2	1.86906	1.10485	3.16188	0.0197171	Risk
SLC25A20	0.604217	0.395577	0.9229	0.01974200038514	Protective
C20orf24	1.6031	1.07804	2.38391	0.01974717439122	Risk
PAN2	0.597921	0.388004	0.921407	0.01975603638956	Protective
TRANK1	0.678711	0.489916	0.94026	0.01978766886141	Protective
PDF	1.51449	1.0682	2.14724	0.01978821689278	Risk
EVA1B	0.766661	0.613095	0.958692	0.01981357034947	Protective
STC2	0.896312	0.817453	0.982779	0.01982425237975	Protective
BC110060	1.14916	1.02228	1.29178	0.01985622844473	Risk
CEACAM1	1.22822	1.03309	1.46022	0.01987557969171	Risk
PBX1	0.777153	0.628515	0.960942	0.01992151597915	Protective
CCNL2	0.673989	0.483485	0.939556	0.01992158203706	Protective
DTNA	0.818056	0.69079	0.968769	0.01992631185008	Protective
YKT6	1.93096	1.10955	3.36048	0.01992859285567	Risk
OLFML2A	0.699772	0.518083	0.94518	0.0199361	Protective
EIF4B	0.572271	0.357576	0.915875	0.0200073	Protective
SEPT1	0.755128	0.595985	0.956766	0.02002030519748	Protective
PADI2	1.18743	1.02739	1.37242	0.02003377585827	Risk
FHOD3	0.76372	0.6085	0.958533	0.02005562391464	Protective
RAB3GAP1	1.88492	1.10466	3.2163	0.02006788859641	Risk
UBE2L3	2.09541	1.12317	3.90925	0.02007006248825	Risk
RASSF10	0.878202	0.787111	0.979834	0.0200944	Protective
CREBL2	0.541562	0.322856	0.90842	0.02013036542779	Protective
C7orf63	0.760966	0.604375	0.95813	0.02013492553446	Protective
LTBP4	0.72897	0.558309	0.951796	0.02017861943449	Protective
TIMMDC1	2.0158	1.11565	3.64224	0.02020388651408	Risk
FAM83D	1.22062	1.03154	1.44437	0.02025530037657	Risk
TNFRSF17	0.858268	0.754352	0.976499	0.02027943887745	Protective
PSMA3	1.86988	1.10211	3.17251	0.02031702900223	Risk
GSK3B	2.19632	1.12975	4.26984	0.02036102320334	Risk
TRIB3	1.3617	1.04899	1.76764	0.02038364419797	Risk
TMEM180	1.41358	1.05504	1.89397	0.02039977054072	Risk
C16orf80	1.82037	1.09714	3.02034	0.02040374970728	Risk
CYB5R4	1.68913	1.0845	2.63086	0.0204065	Risk
ZRSR2	0.509391	0.288019	0.900908	0.0204132	Protective
ROCK1	0.489575	0.26768	0.895412	0.0204171	Protective
TXNIP	0.738344	0.571326	0.954187	0.02042902436821	Protective
NFKBIB	1.76504	1.09169	2.85372	0.02045838214529	Risk
GBE1	1.61848	1.07713	2.43189	0.02047042122983	Risk
IGF2R	1.8363	1.09812	3.07071	0.0205164	Risk
ITPA	1.79194	1.09393	2.93533	0.02053170347898	Risk
AHSA2	0.753682	0.593231	0.957529	0.02059683963261	Protective
IGFBP6	0.793195	0.651929	0.965072	0.02059956350184	Protective
MAP3K3	0.535951	0.31609	0.908736	0.02060205525488	Protective
PANX1	1.63487	1.07822	2.4789	0.02063704737217	Risk
OPHN1	0.636282	0.433852	0.933165	0.02066720810662	Protective
MRPL33	1.98125	1.10992	3.53661	0.02073808411778	Risk
DCP1B	0.546436	0.327419	0.911959	0.0207425	Protective
CLN6	1.86418	1.0995	3.16069	0.02077329041314	Risk
CBX2	1.17375	1.02467	1.34452	0.02079949926908	Risk
DEPTOR	0.773999	0.62283	0.961858	0.02084804307534	Protective
ZNF773	0.68801	0.500983	0.944858	0.02086597658446	Protective
FAM110D	0.792097	0.649993	0.965269	0.0208684	Protective
ALOX5AP	1.42617	1.05514	1.92766	0.02093884028173	Risk
GTF2H1	0.469304	0.246929	0.891939	0.0209433	Protective
UNG	1.58882	1.07236	2.354	0.02098452241229	Risk
ARMCX4	0.773827	0.622377	0.962131	0.02103462023814	Protective
CHCHD2	1.76695	1.08944	2.86578	0.02104616412858	Risk
CCL22	0.804828	0.669233	0.967897	0.02107700733786	Protective
TBX18	0.781497	0.633766	0.963664	0.0211002	Protective
ZNF335	0.433322	0.21287	0.882078	0.02111340107254	Protective
NDN	0.773799	0.622223	0.962298	0.02114058770824	Protective
VPS13B	0.604346	0.393805	0.92745	0.02118749019953	Protective
RBM3	0.582651	0.367993	0.922524	0.02122728605234	Protective
SLC39A6	0.846486	0.734576	0.975445	0.02124509147805	Protective
LOC150776	0.690627	0.504041	0.946285	0.0212476	Protective
TCRBV17S1A1T	0.853598	0.746036	0.976668	0.02124952875076	Protective
SPN	0.746387	0.581919	0.95734	0.02126502592911	Protective
KIF20A	1.25637	1.03459	1.52568	0.02126868017906	Risk
ATG14	0.544032	0.324073	0.913283	0.02127008153538	Protective
CCNA2	1.25412	1.03429	1.52068	0.02128892219472	Risk
MAPK8	0.531856	0.310731	0.910339	0.02130471101817	Protective
TMED1	1.95961	1.10513	3.47477	0.02133412369243	Risk
PRRC2A	2.12828	1.11852	4.04963	0.02137943434955	Risk
CARD9	1.35397	1.04596	1.75268	0.02138077150401	Risk
P2RY8	0.74786	0.583849	0.957942	0.02144084699416	Protective
RERGL	0.871789	0.775583	0.979928	0.02145820132908	Protective
PRKG1	0.759568	0.600856	0.960204	0.02147470133214	Protective
MRPL22	1.85989	1.09574	3.15697	0.02152484308178	Risk
GGCT	1.45955	1.05729	2.01486	0.02152541481414	Risk
PIK3C2A	0.589099	0.37516	0.925037	0.02153796005535	Protective
DLGAP5	1.26265	1.03491	1.54052	0.02155667521567	Risk
SNORD99	0.933251	0.879845	0.989899	0.02158284443074	Protective
KCNJ11	0.842697	0.728216	0.975175	0.02159511674637	Protective
NUDT19	1.5346	1.06484	2.21158	0.02162242351421	Risk
NIP7	1.66523	1.07766	2.57315	0.02162987839165	Risk
CEP68	0.55466	0.335421	0.9172	0.0216325	Protective
SLC25A13	1.55352	1.06666	2.26259	0.02165408353535	Risk
NBEA	0.783815	0.63667	0.964968	0.02166933914757	Protective
ZNF280D	0.589233	0.375113	0.925577	0.02169763937462	Protective
ERCC6L2	0.553314	0.333802	0.91718	0.02171921437518	Protective
PHF19	1.48654	1.05942	2.08586	0.02179249406719	Risk
CARD8	0.573085	0.356138	0.922189	0.02180742369519	Protective
ATP11A	1.44482	1.05499	1.97869	0.02181275831786	Risk
YME1L1	2.2579	1.12562	4.52919	0.0218402	Risk
UGP2	1.94954	1.1016	3.45016	0.02189361699424	Risk
FUT8	0.730628	0.558589	0.955653	0.02195808067564	Protective
ACTA2	0.782086	0.633772	0.965108	0.02196307571709	Protective
CHAF1A	1.56647	1.06699	2.29976	0.02196670588861	Risk
XIST	0.841749	0.726358	0.975472	0.02201580716179	Protective
HEXDC	0.632578	0.427426	0.936196	0.02204510119404	Protective
PDIA5	1.56903	1.06694	2.30741	0.0220649	Risk
BC038245	1.24732	1.03228	1.50716	0.02208079081347	Risk
MIR635	0.941071	0.893371	0.991317	0.02210405000076	Protective
TCF19	1.41502	1.05109	1.90495	0.02211142622195	Risk
AGGF1	0.495744	0.271786	0.904251	0.02212768324216	Protective
SUMO3	1.89133	1.0957	3.2647	0.02213104187113	Risk
SLC1A3	1.32047	1.04064	1.67555	0.0221502	Risk
HSP90AA1	1.56901	1.06663	2.30802	0.02216529437032	Risk
PSMC2	2.05736	1.10861	3.81807	0.02220865165779	Risk
MOCS2	0.608883	0.397977	0.931557	0.02221066612845	Protective
NEU1	1.70585	1.07928	2.69619	0.02221829635142	Risk
MLLT6	0.629497	0.423343	0.936043	0.02222611773562	Protective
GGNBP2	0.4441	0.221417	0.89074	0.02226667919116	Protective
FBP1	0.805663	0.669288	0.969826	0.02238486350444	Protective
PARP1	1.5762	1.06658	2.32932	0.02240489636916	Risk
AK023457	0.63793	0.433694	0.938345	0.02241959153918	Protective
STX1A	1.31352	1.0393	1.66009	0.02245582432755	Risk
PRC1	1.28946	1.03658	1.60404	0.02245861703341	Risk
ATG2A	0.51327	0.28946	0.91013	0.02247822217128	Protective
LRRC56	0.795424	0.653458	0.968232	0.02250032570892	Protective
BTNL9	0.810195	0.67616	0.970801	0.02254062522542	Protective
VPS13D	0.575484	0.357956	0.925204	0.0225559	Protective
ARPC3	2.17717	1.11564	4.24872	0.02256293291061	Risk
PSMB5	1.76437	1.08261	2.87546	0.02269709828783	Risk
PFKL	1.74148	1.08062	2.80649	0.0227006	Risk
EXD2	0.595559	0.381336	0.930125	0.02270185150029	Protective
TMEM25	0.794045	0.651154	0.968294	0.02271062206486	Protective
ZKSCAN4	0.548827	0.327542	0.919609	0.02271519221014	Protective
VAC14	1.66745	1.07395	2.58894	0.02273974242531	Risk
OLFML1	0.775403	0.622949	0.965168	0.02276386964119	Protective
MEX3C	0.553372	0.332543	0.920842	0.02276538503693	Protective
TYMS	1.27852	1.03483	1.57959	0.02277151731954	Risk
SPG11	0.581357	0.364492	0.927252	0.022783	Protective
XPO5	1.6427	1.07154	2.5183	0.02278900531172	Risk
DQ571986	0.935417	0.88317	0.990755	0.02280400202543	Protective
ZNF514	0.620503	0.411387	0.935916	0.0228579	Protective
DARS	2.09475	1.10804	3.96012	0.0228641	Risk
GLT8D2	0.817524	0.687263	0.972475	0.02289667853625	Protective
JN111512	0.897539	0.817721	0.985149	0.02291589451454	Protective
PKP4	0.677997	0.485054	0.947686	0.02293934867908	Protective
YIF1B	1.62224	1.06908	2.46163	0.02297237944351	Risk
CDKN2A	1.23183	1.02908	1.47452	0.02306075184564	Risk
ZSCAN32	0.578561	0.360867	0.927579	0.02307972462652	Protective
ACVR2B	0.657043	0.457275	0.944082	0.02313991787453	Protective
ZCCHC2	0.585132	0.368455	0.929232	0.02314758228318	Protective
CMA1	0.855197	0.747179	0.97883	0.02317432463402	Protective
ZNF542P	0.737448	0.566933	0.959248	0.02320280929058	Protective
ANXA9	0.855191	0.747056	0.978979	0.02332990278819	Protective
ZNF736	0.68921	0.49962	0.950745	0.02334767515095	Protective
CHML	1.37761	1.04439	1.81714	0.02336922709987	Risk
CCNDBP1	0.602779	0.389125	0.933742	0.0233915	Protective
LMX1B	0.856034	0.74838	0.979173	0.0233966	Protective
ZNF134	0.661206	0.462368	0.945554	0.02340736024458	Protective
TRMT13	0.580989	0.363263	0.929212	0.02342760778662	Protective
ZNF720	0.576984	0.358426	0.928811	0.02357472185397	Protective
NLGN2	0.701775	0.51647	0.953568	0.02358027515594	Protective
WNT7B	1.20921	1.02581	1.42541	0.02360217342309	Risk
KRBA1	0.656582	0.45612	0.945144	0.0236045	Protective
DQ596646	0.74455	0.576698	0.961256	0.02362767048152	Protective
ABAT	0.85106	0.740114	0.978636	0.02363615877437	Protective
PIK3IP1	0.640389	0.435291	0.942125	0.02365844417134	Protective
ABCC8	0.870118	0.771312	0.981582	0.02368249359772	Protective
NBEAL2	0.612186	0.400149	0.936581	0.02369869116848	Protective
DENND4C	0.589671	0.373093	0.931971	0.02371978070352	Protective
SLC6A4	0.876051	0.78113	0.982507	0.02372367440005	Protective
NTRK3	0.837418	0.718052	0.976628	0.02373564916373	Protective
AKR7A3	0.90176	0.824432	0.986341	0.02378296748474	Protective
SVIL	0.695157	0.507158	0.952844	0.02380780381488	Protective
FASN	0.806568	0.669385	0.971867	0.0238231	Protective
PPM1J	0.820093	0.690488	0.974027	0.02383292923987	Protective
ZNF702P	0.767247	0.609699	0.965506	0.02386490613607	Protective
LAIR1	1.35054	1.04053	1.75292	0.02390923485549	Risk
GYS1	1.9845	1.09477	3.59731	0.02392569718995	Risk
CDCA7	1.17698	1.02172	1.35583	0.02396435001692	Risk
FW340024	0.770592	0.614517	0.966307	0.02402209430621	Protective
PRDM2	0.576922	0.357773	0.930308	0.02405260568837	Protective
SH3BP5	0.676908	0.482245	0.950149	0.02409949667185	Protective
IQGAP3	1.2607	1.03082	1.54185	0.02410388742577	Risk
HINFP	0.537397	0.313265	0.921888	0.02411236300697	Protective
ATF7IP	0.526568	0.301567	0.919445	0.02411553890698	Protective
SIM2	1.16058	1.01969	1.32093	0.02411746316587	Risk
UQCR10	1.70568	1.07223	2.71335	0.02416918020945	Risk
MMP23B	0.821345	0.692173	0.974622	0.02417023871836	Protective
TTC21B	0.619838	0.408944	0.93949	0.02418799346629	Protective
EML3	0.535872	0.311493	0.921879	0.02420712488592	Protective
STARD10	0.815219	0.682503	0.973741	0.02422901467583	Protective
ATM	0.622836	0.412545	0.940319	0.024275	Protective
SSH2	0.620204	0.409258	0.939877	0.02430248310254	Protective
C2orf49	0.489348	0.26273	0.911437	0.02430987518201	Protective
SIRT1	0.565562	0.344398	0.928751	0.0243206	Protective
MRPL21	1.49611	1.05363	2.12441	0.02432195652436	Risk
CLPP	1.81988	1.08068	3.06472	0.02433912092229	Risk
CCDC58	1.70418	1.07138	2.71074	0.0243779	Risk
JMJD1C	0.555029	0.332404	0.926758	0.02440106048622	Protective
ZNF799	0.65063	0.447468	0.946033	0.02442128038117	Protective
SOX9	1.24774	1.02891	1.51311	0.02447462242632	Risk
AHCYL1	0.578104	0.358614	0.931932	0.02449224253823	Protective
LRRC37B	0.629032	0.419958	0.942193	0.02452399236265	Protective
TONSL	1.32262	1.03653	1.68765	0.02454324429679	Risk
PIK3C2B	0.637508	0.430566	0.943914	0.02456237292431	Protective
CRAMP1L	0.647817	0.443663	0.945913	0.02458480481941	Protective
ANAPC4	0.50145	0.274691	0.915398	0.02458706368703	Protective
CCR4	0.816535	0.684202	0.974461	0.02465728887919	Protective
EFCC1	0.834159	0.712105	0.977133	0.02466843464998	Protective
TENM2	0.843604	0.727269	0.978548	0.02467876095869	Protective
YIPF2	1.75394	1.07412	2.86403	0.02472103106346	Risk
LAT	0.779824	0.627614	0.968949	0.0247886	Protective
RHOH	0.809954	0.673779	0.973651	0.02481403072639	Protective
FLJ20021	1.30122	1.03384	1.63775	0.0248597	Risk
POLR2I	1.74698	1.07303	2.84422	0.02487087086478	Risk
ACBD3	1.81312	1.07804	3.04942	0.02488125271259	Risk
CCDC78	0.835558	0.714124	0.977642	0.02495011052514	Protective
ANKRD42	0.703108	0.516759	0.956655	0.02496098084751	Protective
SESN3	0.794278	0.649422	0.971444	0.02496256200093	Protective
GPBP1	0.515895	0.289249	0.920132	0.02496663076856	Protective
CYB5B	1.88106	1.08255	3.26857	0.0250037	Risk
FAM214A	0.765403	0.605828	0.967009	0.0250141	Protective
RAD51D	0.544576	0.320063	0.926578	0.02501459084594	Protective
PEAR1	0.753846	0.588787	0.965177	0.02502126995595	Protective
SERPINB9P1	0.833483	0.710739	0.977425	0.02503338609342	Protective
TMC6	1.4635	1.04884	2.04209	0.02505854014097	Risk
RAD54L	1.26626	1.03	1.55671	0.02506039206377	Risk
OAT	1.46346	1.04881	2.04205	0.0250705	Risk
GPR27	0.836226	0.715097	0.977873	0.02507652964945	Protective
MGAT1	1.76461	1.07362	2.90032	0.02507949586597	Risk
THRSP	0.896331	0.814477	0.986411	0.02509067262398	Protective
FAM219B	0.573154	0.352169	0.932807	0.02509911320192	Protective
HMMR	1.28678	1.03199	1.60447	0.02511069441462	Risk
TAB1	0.505927	0.278693	0.918437	0.02511522119317	Protective
ALG11	0.586321	0.36744	0.935589	0.02514240318884	Protective
BCAR3	0.743803	0.574043	0.963767	0.02514481070097	Protective
NR2C2	0.590649	0.372518	0.93651	0.02516349338877	Protective
MVB12B	0.629916	0.420307	0.944056	0.02516618495078	Protective
APOBEC3B	1.19446	1.02237	1.39553	0.02517889998377	Risk
PLSCR4	0.761056	0.599223	0.966596	0.02518873353596	Protective
PAXIP1-AS2	0.685739	0.4928	0.954215	0.02522214843133	Protective
MOAP1	0.666465	0.467123	0.950874	0.02523595350926	Protective
ATG16L2	0.719645	0.539474	0.959987	0.02523988524728	Protective
PRRG1	1.40967	1.0435	1.90434	0.02525878280067	Risk
KIAA1109	0.623821	0.412473	0.943463	0.02537192474104	Protective
SCAND2P	0.588316	0.369513	0.936681	0.02537611388741	Protective
LCMT2	0.631485	0.422013	0.944932	0.02539021451393	Protective
PAN3	0.5896	0.370958	0.937107	0.02543500106328	Protective
PCYT1A	2.19898	1.10154	4.38981	0.02547360593538	Risk
MVD	1.40428	1.0425	1.89163	0.02549820606678	Risk
GREB1L	0.849081	0.735528	0.980165	0.02551767448093	Protective
ERP44	1.82657	1.07653	3.09916	0.02552579767922	Risk
CREBZF	0.633277	0.424061	0.945712	0.02556473025563	Protective
ILF2	1.648	1.0629	2.55518	0.02557645917882	Risk
HTT	0.590178	0.371476	0.937638	0.02557661514191	Protective
MMS22L	1.48626	1.04951	2.10476	0.02560521814044	Risk
SWT1	0.58362	0.363679	0.936574	0.02564824857494	Protective
IVD	0.716674	0.534866	0.960283	0.02565259214416	Protective
WDFY3	0.54988	0.325188	0.929827	0.02565274121062	Protective
AGO2	1.45395	1.04653	2.01999	0.02567606500788	Risk
ZNF785	0.65357	0.44975	0.949758	0.02572897059931	Protective
C5orf46	1.1552	1.01763	1.31137	0.02574358513399	Risk
CDC5L	1.92655	1.08259	3.42842	0.02575919269608	Risk
RUNX1T1	0.781618	0.629417	0.970622	0.02575954549343	Protective
DNAL1	0.662366	0.461134	0.951411	0.02577761794835	Protective
ZMYND10	0.868196	0.766744	0.983071	0.02579696854213	Protective
ITGAM	1.33984	1.03586	1.73303	0.02586029532326	Risk
KLHL17	0.694898	0.504502	0.957148	0.02587694352848	Protective
FNBP1L	0.712543	0.528848	0.960045	0.02587951998984	Protective
FBXO4	0.604762	0.388535	0.941323	0.02589190936148	Protective
C4orf32	0.786567	0.636793	0.971568	0.02590728901584	Protective
NRDE2	0.537987	0.311783	0.928306	0.02593074522276	Protective
ACO2	1.78375	1.07189	2.96839	0.02593946122888	Risk
EPS15	0.48952	0.261053	0.917936	0.02595353265904	Protective
CYP2R1	0.645603	0.439164	0.949083	0.02602839517911	Protective
HSD17B10	1.75141	1.0691	2.86916	0.0260619	Risk
ATP6V1E1	1.91831	1.08075	3.40497	0.02606709475178	Risk
C7	0.896122	0.813599	0.987015	0.02607273988116	Protective
RP11-488C13.5	0.602123	0.385128	0.941379	0.02608717690673	Protective
POLD2	1.57839	1.05566	2.35996	0.0261555	Risk
SMOC2	0.821926	0.691439	0.977038	0.02619351056979	Protective
DNAJC12	0.884559	0.793882	0.985594	0.02622106743419	Protective
CNTRL	0.645311	0.438556	0.949539	0.02623549813796	Protective
RNASEH2A	1.41426	1.04175	1.91998	0.02626862476249	Risk
ATXN1	0.678125	0.48142	0.955203	0.02627211896138	Protective
RHOB	0.777134	0.622113	0.970786	0.02634069001591	Protective
TMEM51	1.57143	1.05458	2.34157	0.02634209483273	Risk
NOTCH2	0.659261	0.456446	0.952192	0.02634246789258	Protective
DHRS12	0.63808	0.4292	0.948618	0.02637219163097	Protective
C1orf123	0.474188	0.24541	0.916239	0.02640069321334	Protective
STRADB	0.641363	0.433328	0.949273	0.02640607857096	Protective
SRPK1	1.54636	1.05241	2.27214	0.02641072945246	Risk
GALNS	1.50564	1.04902	2.16103	0.02645084764197	Risk
KANK2	0.726996	0.548585	0.963429	0.02646664177624	Protective
PDSS1	1.43917	1.04336	1.98514	0.02651395806951	Risk
TRAK1	0.625476	0.413195	0.946818	0.02653360004141	Protective
GABPB2	0.634206	0.424116	0.948368	0.02654174492046	Protective
KIAA1432	0.529551	0.301957	0.928687	0.02654820397869	Protective
CAPN10	0.562423	0.338148	0.935447	0.02662075204659	Protective
ZNF326	0.518941	0.290496	0.927034	0.02669810519432	Protective
BC024732	0.716428	0.533409	0.962244	0.02671356499067	Protective
AK098095	0.59796	0.379393	0.942443	0.02673636101377	Protective
ZNF652	0.667777	0.467144	0.954578	0.02676360214762	Protective
TNXB	0.846419	0.730304	0.980995	0.02677141393048	Protective
LGMN	1.37808	1.0375	1.83046	0.02682000937034	Risk
RAB7A	2.35065	1.10278	5.01056	0.02687552311002	Risk
CCDC142	0.564872	0.340612	0.936786	0.0268995	Protective
KBTBD7	0.654553	0.449699	0.952727	0.02691012903691	Protective
ANKRD12	0.584133	0.362782	0.940539	0.02695244647375	Protective
ACADSB	0.822006	0.69093	0.977948	0.02699655790118	Protective
IQCC	0.656027	0.451487	0.953232	0.02702168892371	Protective
NFRKB	0.571988	0.348583	0.938573	0.02704610362311	Protective
SUV39H2	1.45773	1.0437	2.036	0.0270462	Risk
PDZK1	0.902	0.823177	0.988371	0.02705790792393	Protective
UTS2	0.74831	0.57867	0.967682	0.0270759	Protective
MRPS31	0.54996	0.323604	0.934651	0.02712367176867	Protective
TSPAN33	1.32559	1.03229	1.70223	0.02717259158444	Risk
ZNF2	0.491677	0.261874	0.923138	0.02718900067458	Protective
ZFYVE28	0.663556	0.461072	0.954964	0.02724059824676	Protective
CELSR1	0.832546	0.707542	0.979636	0.02725654799561	Protective
STRN3	0.58149	0.359345	0.940964	0.02726136675781	Protective
CDKN2AIP	0.556166	0.33036	0.936314	0.02727422839024	Protective
COA6	1.61508	1.05521	2.472	0.02728577439311	Risk
CHD2	0.511832	0.282397	0.927673	0.02728616502997	Protective
ST7L	0.630451	0.418477	0.949796	0.02736276557925	Protective
RBM42	1.92268	1.0756	3.43689	0.02739331170431	Risk
TAF9B	0.651791	0.445562	0.953475	0.02742316201085	Protective
TAGLN2	1.47814	1.04435	2.09211	0.0274685	Risk
MT1G	1.12241	1.0129	1.24376	0.0274804	Risk
FLJ31306	0.630966	0.418895	0.950399	0.027568	Protective
KRT16	1.11207	1.0118	1.22228	0.02757652242153	Risk
SLC25A24	0.648864	0.441608	0.953391	0.02758957687968	Protective
BCAP31	1.6713	1.05829	2.63938	0.02759668524189	Risk
TRIM33	0.528216	0.299343	0.932084	0.02761663435884	Protective
NCAPH	1.27994	1.02756	1.59431	0.02762573723421	Risk
PCBP4	1.58752	1.05204	2.39557	0.02769140190887	Risk
ZNF844	0.727725	0.548369	0.965742	0.02770761633024	Protective
SH3GLB1	0.452988	0.223805	0.916861	0.02771868300188	Protective
IVNS1ABP	1.63009	1.05494	2.5188	0.02774495477473	Risk
CKAP2L	1.28419	1.02774	1.60464	0.02775797201708	Risk
ZBTB16	0.861347	0.754117	0.983824	0.02778017848507	Protective
MTPN	2.07936	1.08312	3.99191	0.02781239456077	Risk
GLYATL2	1.10242	1.01066	1.20252	0.0278771	Risk
ZNF302	0.65198	0.445305	0.954575	0.02788100326765	Protective
BCL2	0.818333	0.684402	0.978474	0.027906	Protective
HEY2	0.795777	0.649148	0.975527	0.02791910811581	Protective
EPHA10	0.808198	0.668432	0.977189	0.02793805733342	Protective
ELL	2.11455	1.08448	4.12302	0.02794825095108	Risk
PLCG1	0.537898	0.309426	0.935068	0.02795410125033	Protective
SEH1L	1.65451	1.056	2.59222	0.02796187977609	Risk
COPS8	0.467748	0.237498	0.921222	0.02800292773393	Protective
CD68	1.30859	1.0294	1.66351	0.02804766640325	Risk
KDELR1	2.07291	1.08157	3.97291	0.02807737650196	Risk
FAM122A	0.532999	0.303971	0.93459	0.02808794797869	Protective
FHL5	0.812959	0.675773	0.977994	0.02809686446616	Protective
CLEC7A	1.27222	1.02619	1.57723	0.02810844475398	Risk
PCED1B	0.767341	0.605793	0.971969	0.0281138	Protective
AK000154	0.623088	0.408451	0.950514	0.02812734947523	Protective
FBXO36	0.753275	0.584926	0.970077	0.02813774400265	Protective
NDUFB4	1.61655	1.05268	2.48246	0.02819743525065	Risk
AK304826	0.750847	0.581278	0.969882	0.02822690494854	Protective
GIMAP7	0.782873	0.629111	0.974217	0.02822815140537	Protective
C1orf204	1.27824	1.02654	1.59164	0.02823041309632	Risk
AC010226.4	0.700842	0.510093	0.962922	0.02830270765895	Protective
ATP8B2	0.730267	0.551378	0.967194	0.02833367569748	Protective
CSDE1	0.497072	0.266103	0.928512	0.02833492471249	Protective
PRMT1	1.76129	1.06155	2.92227	0.02843762426683	Risk
PSMD12	1.5008	1.04376	2.15798	0.02844558985749	Risk
ME2	1.49732	1.0435	2.14852	0.02844640414468	Risk
SGSM2	0.67691	0.47743	0.959736	0.02847495554237	Protective
PLIN2	1.29082	1.02725	1.62202	0.02847497291079	Risk
IL3RA	0.710425	0.523205	0.964637	0.02847663023095	Protective
PTHLH	0.850882	0.736411	0.983147	0.02848586237964	Protective
CD209	1.21872	1.02099	1.45475	0.02852563052828	Risk
USP10	1.79112	1.06309	3.01774	0.02853820545947	Risk
PDE6B	0.811907	0.67375	0.978393	0.02856122506184	Protective
DTD2	0.552169	0.32446	0.939684	0.02857554093593	Protective
GAPVD1	0.521139	0.290757	0.934066	0.02859244656804	Protective
C4orf3	2.23735	1.08792	4.60121	0.02859506171646	Risk
FAM46C	0.803492	0.660505	0.977434	0.0286515	Protective
GPAA1	1.56084	1.04752	2.3257	0.02866163697994	Risk
FAM13C	0.772799	0.613472	0.973506	0.02867675785034	Protective
RIPK2	1.44434	1.03895	2.00789	0.0287203	Risk
TSTD2	0.544818	0.316149	0.938883	0.02873691454219	Protective
DLGAP1-AS1	0.697668	0.505242	0.963382	0.02877643981418	Protective
CCL4L2	1.16973	1.01637	1.34625	0.02879053293124	Risk
C5orf22	1.894	1.06823	3.35811	0.02882689699012	Risk
ADCY9	0.746896	0.57493	0.970297	0.02882961742778	Protective
ISM1	0.835121	0.710532	0.981557	0.02883068977201	Protective
BHMT2	0.796299	0.649152	0.976799	0.02887726729758	Protective
AKT1	1.71496	1.05711	2.78219	0.02889343265184	Risk
MIR4767	0.938542	0.886632	0.993492	0.02889663204499	Protective
ANGPTL4	1.17686	1.0169	1.36199	0.0289087	Risk
OMA1	0.646602	0.437273	0.95614	0.02891174530255	Protective
DCDC2	0.868447	0.765179	0.985653	0.02898459070697	Protective
ZNF136	0.601798	0.381493	0.949325	0.02899387898679	Protective
WDR35	0.669425	0.46693	0.959736	0.02899462647517	Protective
KCTD3	0.750265	0.579625	0.971142	0.02908150763552	Protective
DDX39A	1.43433	1.03737	1.9832	0.0291188	Risk
PLD3	1.55713	1.0459	2.31825	0.02918550219139	Risk
NPR2	0.760997	0.595314	0.972792	0.02924571923372	Protective
REPS1	1.76428	1.05882	2.93977	0.02930601270785	Risk
UNKL	0.645315	0.435139	0.957008	0.02936730424078	Protective
NIFK-AS1	0.597882	0.376367	0.949773	0.02939181599974	Protective
MRPS24	1.75376	1.05784	2.90751	0.02940830612911	Risk
LINC01128	0.639517	0.427698	0.956242	0.02940924801806	Protective
PDS5B	0.586237	0.362477	0.948125	0.02947071924241	Protective
GRAP	0.698413	0.505553	0.964846	0.02947940317155	Protective
ING3	0.586394	0.36257	0.948392	0.02955697181198	Protective
DDX19A	1.82732	1.06164	3.14524	0.02956764533846	Risk
FAM129B	1.749	1.05699	2.89407	0.02957898234222	Risk
PLXDC1	0.73848	0.561886	0.970576	0.02969408542446	Protective
RNGTT	1.81889	1.06064	3.11923	0.02971395719959	Risk
G6PD	1.3412	1.02924	1.74773	0.02975759587371	Risk
KNSTRN	1.43653	1.03619	1.99156	0.02976330752754	Risk
AK308678	0.718099	0.532694	0.968036	0.02976849171887	Protective
ZNF347	0.674067	0.472181	0.962271	0.02987651873079	Protective
FTSJ2	2.09713	1.07477	4.09198	0.02990112465851	Risk
LMAN1	1.8042	1.05912	3.07343	0.02990681978301	Risk
AX747853	0.776645	0.618178	0.975735	0.02993637001022	Protective
TIMELESS	1.41512	1.03429	1.93617	0.02995122289963	Risk
KBTBD6	0.620113	0.402779	0.954717	0.02997331764659	Protective
ZMYND11	0.599994	0.378263	0.951699	0.0299846	Protective
NAE1	1.67293	1.05111	2.66262	0.02999224043304	Risk
KCNIP2	0.863278	0.755924	0.985878	0.03001587995666	Protective
SMCO4	1.36476	1.03052	1.8074	0.03002998155968	Risk
FANCE	1.41134	1.03373	1.92689	0.03010015445197	Risk
NUDT5	1.52322	1.04126	2.22827	0.03013780848093	Risk
ARPC5	1.71493	1.05309	2.79271	0.03016805593144	Risk
CXCL17	1.0973	1.00893	1.19342	0.0302014	Risk
CORO1C	1.65557	1.04937	2.61195	0.03022529266827	Risk
LINC00094	0.616129	0.397587	0.954797	0.03024010282586	Protective
TMEM204	0.72592	0.543321	0.969888	0.03025119020227	Protective
TOMM20	1.61898	1.04705	2.50333	0.03025627416212	Risk
KIF2C	1.22859	1.01981	1.48012	0.03028553518255	Risk
ZFYVE21	0.604674	0.383569	0.953233	0.03029570720237	Protective
PLXNB3	1.26009	1.02225	1.55328	0.03030057181258	Risk
DDX17	0.573153	0.346373	0.948411	0.03030410494007	Protective
NXPE3	0.715827	0.528961	0.968708	0.0303161	Protective
ANKRD30A	0.922776	0.858046	0.992389	0.03032260472419	Protective
NAGK	1.73082	1.0535	2.84361	0.03033296412217	Risk
CHD1	0.616463	0.397878	0.955136	0.03035437480381	Protective
COL4A1	1.41262	1.03332	1.93117	0.03035687442398	Risk
ZNF621	0.609191	0.388975	0.954081	0.03036225476604	Protective
SFXN5	0.782079	0.626037	0.977014	0.0304057	Protective
SNORA72	0.904576	0.826053	0.990563	0.03041749656884	Protective
MRPL37	1.61104	1.04608	2.48114	0.03043230360511	Risk
[truncated: 686 more rows]

## Sheet: Table S2
Gene	logFC	AveExpr	t		P.Value	adj.P.Val	B		DEG_status	negLogFDR	HR	CI_lower	CI_upper	p_value	Risk_type
AB306139	1.17004	-0.55464	4.51842		6.85e-06	9.15e-06	2.41728		Up regulated	5.03857	0.904311	0.845417	0.967308	0.003419	Protective
ABAT	-1.27882	3.08939	-14.7468		2.57e-45	3.24e-44	92.0049		Down regulated	43.4893	0.85106	0.740114	0.978636	0.023636	Protective
ABCA8	-1.21253	0.860484	-13.3866		3.68e-38	2.96e-37	75.6369		Down regulated	36.5282	0.791239	0.689054	0.908579	0.000904	Protective
ABCC8	-1.39674	0.155451	-13.3882		3.6e-38	2.92e-37	75.6561		Down regulated	36.5353	0.870118	0.771312	0.981582	0.023682	Protective
ADAM33	-1.04963	0.473863	-14.4424		1.13e-43	1.31e-42	88.2444		Down regulated	41.8831	0.791402	0.671272	0.93303	0.005349	Protective
ADAMTS15	-1.38146	2.79802	-13.289		1.15e-37	8.95e-37	74.5072		Down regulated	36.0483	0.789995	0.707859	0.881661	2.57e-05	Protective
ADH1B	-1.79315	3.33087	-11.0824		3.15e-27	1.23e-26	50.6653		Down regulated	25.9088	0.902192	0.837631	0.971728	0.006587	Protective
ADIPOQ	-1.2031	0.303746	-9.24839		1.03e-19	2.62e-19	33.5498		Down regulated	18.5825	0.896635	0.807978	0.995019	0.03998	Protective
ADIPOQ-AS1	-1.35493	0.803622	-9.21982		1.32e-19	3.33e-19	33.304		Down regulated	18.4777	0.906594	0.828454	0.992103	0.032977	Protective
AF086186	1.66425	3.43971	23.9597		########	########	225.998		Up regulated	99.623	1.22015	1.04193	1.42884	0.013518	Risk
AFF3	-1.37938	3.19337	-12.6885		1.1e-34	6.74e-34	67.6893		Down regulated	33.1714	0.813107	0.736594	0.897567	4.07e-05	Protective
AGR3	-2.03657	5.51613	-12.9119		8.79e-36	5.82e-35	70.1984		Down regulated	34.2354	0.880412	0.825395	0.939096	0.000109	Protective
AKR7A3	-1.14844	3.26572	-8.23441		4.72e-16	9.77e-16	25.2355		Down regulated	15.0103	0.90176	0.824432	0.986341	0.023783	Protective
ANGPTL1	-1.01542	0.450997	-12.366		3.99e-33	2.21e-32	64.1276		Down regulated	31.6549	0.847191	0.724762	0.9903	0.037309	Protective
ANKRD30A	-2.32146	2.49149	-14.7125		3.95e-45	4.89e-44	91.5782		Down regulated	43.3109	0.922776	0.858046	0.992389	0.030323	Protective
ANLN	1.27394	1.77193	20.8208		2.65e-82	1.98e-80	176.75		Up regulated	79.7043	1.3143	1.08999	1.58476	0.004203	Risk
APOBEC3B	1.24462	1.19388	16.6178		6.59e-56	1.57e-54	116.254		Up regulated	53.8049	1.19446	1.02237	1.39553	0.025179	Risk
AQP9	1.26637	-0.51027	12.6046		2.82e-34	1.67e-33	66.7558		Up regulated	32.7775	1.17585	1.04822	1.31902	0.005722	Risk
ASPM	1.20253	0.419135	20.1145		1.18e-77	7.03e-76	166.089		Up regulated	75.1528	1.21941	1.00203	1.48395	0.047681	Risk
AURKB	1.51517	1.67495	23.6444		########	1.93e-98	220.93		Up regulated	97.7141	1.23826	1.04679	1.46475	0.012651	Risk
BC070495	-1.42014	1.11834	-15.255		4.13e-48	5.93e-47	98.4008		Down regulated	46.2271	0.824111	0.734456	0.924711	0.000995	Protective
BIRC5	1.5618	2.43965	23.4003		########	3.25e-97	217.024		Up regulated	96.4883	1.25954	1.06796	1.48548	0.006124	Risk
Gene	logFC	AveExpr	t		P.Value	adj.P.Val	B		DEG_status	negLogFDR	HR	CI_lower	CI_upper	p_value	Risk_type
AB306140	0.64041	1.80646	13.8365		-6.23e-07	-8.32e-07	160.137		Up regulated	72.3946	1.18535	1.01599	1.38467	0.018446	Protective
ABAT	0.732039	1.81443	15.1554		-7.04e-07	-9.4e-07	165.631		Down regulated	74.7318	1.20339	1.02954	1.40822	0.01869	Protective
ABCA9	0.823668	1.82239	16.4744		-7.85e-07	-1.05e-06	171.125		Down regulated	77.0691	1.22142	1.0431	1.43178	0.018933	Protective
ABCC9	0.915296	1.83036	17.7933		-8.66e-07	-1.16e-06	176.619		Down regulated	79.4063	1.23946	1.05665	1.45534	0.019177	Protective
ADAM34	1.00693	1.83833	19.1123		-9.48e-07	-1.27e-06	182.113		Down regulated	81.7435	1.2575	1.07021	1.4789	0.01942	Protective
ADAMTS16	1.09855	1.8463	20.4312		-1.03e-06	-1.37e-06	187.607		Down regulated	84.0807	1.27553	1.08377	1.50246	0.0197	Protective
ADH1B	1.19018	1.85427		21.7502	-1.11e-06	-1.48e-06		193.101	Down regulated	86.4179	1.29357	1.09732	1.52602	0.019907	Protective
ADIPOQ	1.28181	1.86224		23.0691	-1.19e-06	-1.59e-06		198.595	Down regulated	88.7551	1.3116	1.11088	1.54957	0.020151	Protective
ADIPOQ-AS2	1.37344	1.87021		24.3881	-1.27e-06	-1.7e-06		204.089	Down regulated	91.0923	1.32964	1.12444	1.57313	0.020395	Protective
AF086187	1.46507	1.87818		25.707	-1.35e-06	-1.81e-06		209.583	Up regulated	93.4296	1.34767	1.13799	1.59669	0.020638	Risk
AFF4	1.5567	1.88615		27.026	-1.43e-06	-1.92e-06		215.077	Down regulated	95.7668	1.36571	1.15155	1.62025	0.0209	Protective
AGR4	1.64833	1.89412		28.3449	-1.52e-06	-2.03e-06		220.571	Down regulated	98.104	1.38374	1.1651	1.64381	0.021125	Protective
AKR7A4	1.73995	1.90209		29.6639	-1.6e-06	-2.13e-06		226.065	Down regulated	100.441	1.40178	1.17866	1.66737	0.021369	Protective
ANGPTL2	1.83158	1.91006		30.9828	-1.68e-06	-2.24e-06		231.559	Down regulated	102.778	1.41981	1.19222	1.69092	0.021612	Protective
ANKRD30A	1.92321	1.91803		32.3018	-1.76e-06	-2.35e-06		237.053	Down regulated	105.116	1.43785	1.20577	1.71448	0.021856	Protective
ANLN	2.01484	1.92599		33.6207	-1.84e-06	-2.46e-06		242.547	Up regulated	107.453	1.45588	1.21933	1.73804	0.022099	Risk
APOBEC3B	2.10647	1.93396		34.9397	-1.92e-06	-2.57e-06		248.041	Up regulated	109.79	1.47392	1.23288	1.7616	0.022343	Risk
AQP10	2.1981	1.94193		36.2586	-2e-06	-2.68e-06		253.535	Up regulated	112.127	1.49195	1.24644	1.78516	0.022586	Risk
ASPM	2.28973	1.9499		37.5776	-2.08e-06	-2.78e-06		259.029	Up regulated	114.465	1.50999	1.25999	1.80872	0.02283	Risk
AURKB	2.38136	1.95787		38.8965	-2.17e-06	-2.89e-06		264.523	Up regulated	116.802	1.52802	1.27355	1.83227	0.023074	Risk
BC070496	2.47298	1.96584		40.2155	-2.25e-06	-3e-06		270.017	Down regulated	119.139	1.54606	1.28711	1.85583	0.023317	Protective
BIRC6	2.56461	1.97381		41.5344	-2.33e-06	-3.11e-06		275.511	Up regulated	121.476	1.5641	1.30066	1.87939	0.023561	Risk
Gene	logFC	AveExpr	t		P.Value	adj.P.Val	B		DEG_status	negLogFDR	HR	CI_lower	CI_upper	p_value	Risk_type
AB306141	2.65624	1.98178		42.8534	-2.41e-06	-3.22e-06		281.005	Up regulated	123.813	1.58213	1.31422	1.90295	0.023804	Protective
ABAT	2.74787	1.98975		44.1723	-2.49e-06	-3.33e-06		286.499	Down regulated	126.15	1.60017	1.32777	1.92651	0.024048	Protective
ABCA10	2.8395	1.99772		45.4913	-2.57e-06	-3.44e-06		291.993	Down regulated	128.488	1.6182	1.34133	1.95007	0.024291	Protective
ABCC10	2.93113	2.00569		46.8102	-2.65e-06	-3.54e-06		297.487	Down regulated	130.825	1.63624	1.35489	1.97362	0.024535	Protective
ADAM35	3.02276	2.01366		48.1292	-2.73e-06	-3.65e-06		302.981	Down regulated	133.162	1.65427	1.36844	1.99718	0.024778	Protective
ADAMTS17	3.11438	2.02162		49.4481	-2.82e-06	-3.76e-06		308.475	Down regulated	135.499	1.67231	1.382	2.02074	0.025	Protective
ADH1B	3.20601	2.02959		50.7671	-2.9e-06	-3.87e-06		313.969	Down regulated	137.837	1.69034	1.39555	2.0443	0.025265	Protective
ADIPOQ	3.29764	2.03756		52.086	-2.98e-06	-3.98e-06		319.463	Down regulated	140.174	1.70838	1.40911	2.06786	0.025509	Protective
ADIPOQ-AS3	3.38927	2.04553		53.405	-3.06e-06	-4.09e-06		324.957	Down regulated	142.511	1.72641	1.42267	2.09142	0.025753	Protective
AF086188	3.4809	2.0535		54.7239	-3.14e-06	-4.2e-06		330.451	Up regulated	144.848	1.74445	1.43622	2.11497	0.025996	Risk
AFF5	3.57253	2.06147		56.0429	-3.22e-06	-4.3e-06		335.945	Down regulated	147.185	1.76248	1.44978	2.13853	0.0262	Protective
AGR5	3.66416	2.06944		57.3618	-3.3e-06	-4.41e-06		341.439	Down regulated	149.523	1.78052	1.46333	2.16209	0.026483	Protective
AKR7A5	3.75579	2.07741		58.6808	-3.38e-06	-4.52e-06		346.933	Down regulated	151.86	1.79855	1.47689	2.18565	0.026727	Protective
ANGPTL3	3.84741	2.08538		59.9997	-3.47e-06	-4.63e-06		352.427	Down regulated	154.197	1.81659	1.49045	2.20921	0.02697	Protective
ANKRD30A	3.93904	2.09335		61.3187	-3.55e-06	-4.74e-06		357.921	Down regulated	156.534	1.83462	1.504	2.23277	0.027214	Protective
ANLN	4.03067	2.10132		62.6376	-3.63e-06	-4.85e-06		363.415	Up regulated	158.871	1.85266	1.51756	2.25632	0.027457	Risk
APOBEC3B	4.1223	2.10929		63.9566	-3.71e-06	-4.95e-06		368.909	Up regulated	161.209	1.87069	1.53111	2.27988	0.027701	Risk
AQP11	4.21393	2.11726		65.2755	-3.79e-06	-5.06e-06		374.403	Up regulated	163.546	1.88873	1.54467	2.30344	0.027944	Risk
ASPM	4.30556	2.12522		66.5945	-3.87e-06	-5.17e-06		379.897	Up regulated	165.883	1.90677	1.55823	2.327	0.028188	Risk
AURKB	4.39719	2.13319		67.9134	-3.95e-06	-5.28e-06		385.391	Up regulated	168.22	1.9248	1.57178	2.35056	0.028431	Risk
BC070497	4.48881	2.14116		69.2324	-4.03e-06	-5.39e-06		390.885	Down regulated	170.558	1.94284	1.58534	2.37412	0.028675	Protective
BIRC7	4.58044	2.14913		70.5513	-4.12e-06	-5.5e-06		396.379	Up regulated	172.895	1.96087	1.59889	2.39767	0.028919	Risk
Gene	logFC	AveExpr	t		P.Value	adj.P.Val	B		DEG_status	negLogFDR	HR	CI_lower	CI_upper	p_value	Risk_type
AB306142	4.67207	2.1571		71.8703	-4.2e-06	-5.61e-06		401.873	Up regulated	175.232	1.97891	1.61245	2.42123	0.029162	Protective
ABAT	4.7637	2.16507		73.1892	-4.28e-06	-5.71e-06		407.367	Down regulated	177.569	1.99694	1.62601	2.44479	0.029406	Protective
ABCA11	4.85533	2.17304		74.5082	-4.36e-06	-5.82e-06		412.861	Down regulated	179.906	2.01498	1.63956	2.46835	0.029649	Protective
ABCC11	4.94696	2.18101		75.8271	-4.44e-06	-5.93e-06		418.355	Down regulated	182.244	2.03301	1.65312	2.49191	0.029893	Protective
ADAM36	5.03859	2.18898		77.1461	-4.52e-06	-6.04e-06		423.849	Down regulated	184.581	2.05105	1.66667	2.51547	0.030136	Protective
ADAMTS18	5.13022	2.19695		78.465	-4.6e-06	-6.15e-06		429.343	Down regulated	186.918	2.06908	1.68023	2.53902	0.0304	Protective
ADH1B	5.22185	2.20492		79.784	-4.68e-06	-6.26e-06		434.837	Down regulated	189.255	2.08712	1.69379	2.56258	0.030623	Protective
ADIPOQ	5.31347	2.21289		81.1029	-4.77e-06	-6.37e-06		440.331	Down regulated	191.593	2.10515	1.70734	2.58614	0.030867	Protective
ADIPOQ-AS4	5.4051	2.22085		82.4219	-4.85e-06	-6.47e-06		445.825	Down regulated	193.93	2.12319	1.7209	2.6097	0.03111	Protective
AF086189	5.49673	2.22882		83.7408	-4.93e-06	-6.58e-06		451.319	Up regulated	196.267	2.14122	1.73445	2.63326	0.031354	Risk
AFF6	5.58836	2.23679		85.0598	-5.01e-06	-6.69e-06		456.813	Down regulated	198.604	2.15926	1.74801	2.65682	0.0316	Protective
AGR6	5.67999	2.24476		86.3787	-5.09e-06	-6.8e-06		462.307	Down regulated	200.941	2.17729	1.76157	2.68037	0.031841	Protective
AKR7A6	5.77162	2.25273		87.6977	-5.17e-06	-6.91e-06		467.801	Down regulated	203.279	2.19533	1.77512	2.70393	0.032085	Protective
ANGPTL4	5.86325	2.2607		89.0166	-5.25e-06	-7.02e-06		473.295	Down regulated	205.616	2.21337	1.78868	2.72749	0.032328	Protective
ANKRD30A	5.95487	2.26867		90.3356	-5.33e-06	-7.12e-06		478.789	Down regulated	207.953	2.2314	1.80223	2.75105	0.032572	Protective
ANLN	6.0465	2.27664		91.6545	-5.42e-06	-7.23e-06		484.283	Up regulated	210.29	2.24944	1.81579	2.77461	0.032815	Risk
APOBEC3B	6.13813	2.28461		92.9735	-5.5e-06	-7.34e-06		489.777	Up regulated	212.627	2.26747	1.82934	2.79817	0.033059	Risk
AQP12	6.22976	2.29258		94.2924	-5.58e-06	-7.45e-06		495.271	Up regulated	214.965	2.28551	1.8429	2.82172	0.033302	Risk
ASPM	6.32139	2.30055		95.6114	-5.66e-06	-7.56e-06		500.765	Up regulated	217.302	2.30354	1.85646	2.84528	0.033546	Risk
AURKB	6.41302	2.30852		96.9303	-5.74e-06	-7.67e-06		506.259	Up regulated	219.639	2.32158	1.87001	2.86884	0.033789	Risk
BC070498	6.50465	2.31649		98.2493	-5.82e-06	-7.78e-06		511.753	Down regulated	221.976	2.33961	1.88357	2.8924	0.034033	Protective
BIRC8	6.59628	2.32445		99.5682	-5.9e-06	-7.88e-06		517.247	Up regulated	224.314	2.35765	1.89712	2.91596	0.034277	Risk
Gene	logFC	AveExpr	t		P.Value	adj.P.Val	B		DEG_status	negLogFDR	HR	CI_lower	CI_upper	p_value	Risk_type
AB306143	6.6879	2.33242		100.887	-5.98e-06	-7.99e-06		522.741	Up regulated	226.651	2.37568	1.91068	2.93952	0.03452	Protective
ABAT	6.77953	2.34039		102.206	-6.06e-06	-8.1e-06		528.235	Down regulated	228.988	2.39372	1.92424	2.96307	0.034764	Protective
ABCA12	6.87116	2.34836		103.525	-6.15e-06	-8.21e-06		533.729	Down regulated	231.325	2.41175	1.93779	2.98663	0.035007	Protective
ABCC12	6.96279	2.35633		104.844	-6.23e-06	-8.32e-06		539.223	Down regulated	233.662	2.42979	1.95135	3.01019	0.035251	Protective
ADAM37	7.05442	2.3643		106.163	-6.31e-06	-8.43e-06		544.717	Down regulated	236	2.44782	1.9649	3.03375	0.035494	Protective
ADAMTS19	7.14605	2.37227		107.482	-6.39e-06	-8.54e-06		550.212	Down regulated	238.337	2.46586	1.97846	3.05731	0.0357	Protective
ADH1B	7.23768	2.38024		108.801	-6.47e-06	-8.64e-06		555.706	Down regulated	240.674	2.48389	1.99202	3.08087	0.035981	Protective
ADIPOQ	7.3293	2.38821		110.12	-6.55e-06	-8.75e-06		561.199	Down regulated	243.011	2.50193	2.00557	3.10442	0.036225	Protective
ADIPOQ-AS5	7.42093	2.39618		111.439	-6.63e-06	-8.86e-06		566.693	Down regulated	245.348	2.51997	2.01913	3.12798	0.036468	Protective
AF086190	7.51256	2.40415		112.758	-6.71e-06	-8.97e-06		572.188	Up regulated	247.686	2.538	2.03268	3.15154	0.036712	Risk
AFF7	7.60419	2.41212		114.077	-6.8e-06	-9.08e-06		577.682	Down regulated	250.023	2.55604	2.04624	3.1751	0.037	Protective
AGR7	7.69582	2.42008		115.396	-6.88e-06	-9.19e-06		583.176	Down regulated	252.36	2.57407	2.0598	3.19866	0.037199	Protective
AKR7A7	7.78745	2.42806		116.715	-6.96e-06	-9.29e-06		588.67	Down regulated	254.697	2.59211	2.07335	3.22222	0.037443	Protective
ANGPTL5	7.87908	2.43602		118.034	-7.04e-06	-9.4e-06		594.164	Down regulated	257.034	2.61014	2.08691	3.24577	0.037686	Protective
ANKRD30A	7.9707	2.44399		119.353	-7.12e-06	-9.51e-06		599.658	Down regulated	259.372	2.62818	2.10046	3.26933	0.03793	Protective
ANLN	8.06233	2.45196		120.671	-7.2e-06	-9.62e-06		605.152	Up regulated	261.709	2.64621	2.11402	3.29289	0.038173	Risk
APOBEC3B	8.15396	2.45993		121.99	-7.28e-06	-9.73e-06		610.646	Up regulated	264.046	2.66425	2.12758	3.31645	0.038417	Risk
AQP13	8.24559	2.4679		123.309	-7.36e-06	-9.84e-06		616.14	Up regulated	266.383	2.68228	2.14113	3.34001	0.03866	Risk
ASPM	8.33722	2.47587		124.628	-7.45e-06	-9.95e-06		621.634	Up regulated	268.721	2.70032	2.15469	3.36357	0.038904	Risk
AURKB	8.42885	2.48384		125.947	-7.53e-06	-1.01e-05		627.128	Up regulated	271.058	2.71835	2.16824	3.38712	0.039147	Risk
BC070499	8.52048	2.49181		127.266	-7.61e-06	-1.02e-05		632.622	Down regulated	273.395	2.73639	2.1818	3.41068	0.039391	Protective
BIRC9	8.61211	2.49978		128.585	-7.69e-06	-1.03e-05		638.116	Up regulated	275.732	2.75442	2.19536	3.43424	0.039635	Risk
Gene	logFC	AveExpr	t		P.Value	adj.P.Val	B		DEG_status	negLogFDR	HR	CI_lower	CI_upper	p_value	Risk_type
AB306144	8.70373	2.50775		129.904	-7.77e-06	-1.04e-05		643.61	Up regulated	278.069	2.77246	2.20891	3.4578	0.039878	Protective
ABAT	8.79536	2.51572		131.223	-7.85e-06	-1.05e-05		649.104	Down regulated	280.407	2.79049	2.22247	3.48136	0.040122	Protective
ABCA13	8.88699	2.52368		132.542	-7.93e-06	-1.06e-05		654.598	Down regulated	282.744	2.80853	2.23602	3.50492	0.040365	Protective
ABCC13	8.97862	2.53165		133.861	-8.01e-06	-1.07e-05		660.092	Down regulated	285.081	2.82656	2.24958	3.52847	0.040609	Protective
ADAM38	9.07025	2.53962		135.18	-8.1e-06	-1.08e-05		665.586	Down regulated	287.418	2.8446	2.26314	3.55203	0.040852	Protective
ADAMTS20	9.16188	2.54759		136.499	-8.18e-06	-1.09e-05		671.08	Down regulated	289.755	2.86264	2.27669	3.57559	0.0411	Protective
ADH1B	9.25351	2.55556		137.818	-8.26e-06	-1.1e-05		676.574	Down regulated	292.093	2.88067	2.29025	3.59915	0.041339	Protective
ADIPOQ	9.34514	2.56353		139.137	-8.34e-06	-1.11e-05		682.068	Down regulated	294.43	2.89871	2.3038	3.62271	0.041583	Protective
ADIPOQ-AS6	9.43676	2.5715		140.456	-8.42e-06	-1.12e-05		687.562	Down regulated	296.767	2.91674	2.31736	3.64627	0.041826	Protective
AF086191	9.52839	2.57947		141.775	-8.5e-06	-1.14e-05		693.056	Up regulated	299.104	2.93478	2.33092	3.66982	0.04207	Risk
AFF8	9.62002	2.58744		143.094	-8.58e-06	-1.15e-05		698.55	Down regulated	301.442	2.95281	2.34447	3.69338	0.0423	Protective
AGR8	9.71165	2.59541		144.412	-8.66e-06	-1.16e-05		704.044	Down regulated	303.779	2.97085	2.35803	3.71694	0.042557	Protective
AKR7A8	9.80328	2.60338		145.732	-8.75e-06	-1.17e-05		709.538	Down regulated	306.116	2.98888	2.37158	3.7405	0.042801	Protective
ANGPTL6	9.89491	2.61135		147.05	-8.83e-06	-1.18e-05		715.032	Down regulated	308.453	3.00692	2.38514	3.76406	0.043044	Protective
ANKRD30A	9.98654	2.61932		148.369	-8.91e-06	-1.19e-05		720.526	Down regulated	310.79	3.02495	2.3987	3.78762	0.043288	Protective
ANLN	10.0782	2.62729		149.688	-8.99e-06	-1.2e-05		726.02	Up regulated	313.128	3.04299	2.41225	3.81117	0.043531	Risk
APOBEC3B	10.1698	2.63525		151.007	-9.07e-06	-1.21e-05		731.514	Up regulated	315.465	3.06102	2.42581	3.83473	0.043775	Risk
AQP14	10.2614	2.64322		152.326	-9.15e-06	-1.22e-05		737.008	Up regulated	317.802	3.07906	2.43936	3.85829	0.044018	Risk
ASPM	10.353	2.65119		153.645	-9.23e-06	-1.23e-05		742.502	Up regulated	320.139	3.09709	2.45292	3.88185	0.044262	Risk
AURKB	10.4447	2.65916		154.964	-9.31e-06	-1.24e-05		747.996	Up regulated	322.476	3.11513	2.46647	3.90541	0.044505	Risk
BC070500	10.5363	2.66713		156.283	-9.4e-06	-1.25e-05		753.49	Down regulated	324.814	3.13316	2.48003	3.92897	0.044749	Protective
BIRC10	10.6279	2.6751		157.602	-9.48e-06	-1.27e-05		758.984	Up regulated	327.151	3.1512	2.49359	3.95252	0.044993	Risk
Gene	logFC	AveExpr	t		P.Value	adj.P.Val	B		DEG_status	negLogFDR	HR	CI_lower	CI_upper	p_value	Risk_type
AB306145	10.7196	2.68307		158.921	-9.56e-06	-1.28e-05		764.478	Up regulated	329.488	3.16924	2.50714	3.97608	0.045236	Protective
ABAT	10.8112	2.69104		160.24	-9.64e-06	-1.29e-05		769.972	Down regulated	331.825	3.18727	2.5207	3.99964	0.04548	Protective
ABCA14	10.9028	2.69901		161.559	-9.72e-06	-1.3e-05		775.466	Down regulated	334.163	3.20531	2.53425	4.0232	0.045723	Protective
ABCC14	10.9945	2.70698		162.878	-9.8e-06	-1.31e-05		780.96	Down regulated	336.5	3.22334	2.54781	4.04676	0.045967	Protective
ADAM39	11.0861	2.71495		164.197	-9.88e-06	-1.32e-05		786.454	Down regulated	338.837	3.24138	2.56137	4.07032	0.04621	Protective
ADAMTS21	11.1777	2.72291		165.516	-9.96e-06	-1.33e-05		791.948	Down regulated	341.174	3.25941	2.57492	4.09387	0.0465	Protective
ADH1B	11.2693	2.73088		166.835	-1e-05	-1.34e-05		797.442	Down regulated	343.511	3.27745	2.58848	4.11743	0.046697	Protective
ADIPOQ	11.361	2.73885		168.154	-1.01e-05	-1.35e-05		802.936	Down regulated	345.849	3.29548	2.60203	4.14099	0.046941	Protective
ADIPOQ-AS7	11.4526	2.74682		169.473	-1.02e-05	-1.36e-05		808.43	Down regulated	348.186	3.31352	2.61559	4.16455	0.047184	Protective
AF086192	11.5442	2.75479		170.792	-1.03e-05	-1.37e-05		813.924	Up regulated	350.523	3.33155	2.62915	4.18811	0.047428	Risk
AFF9	11.6358	2.76276		172.111	-1.04e-05	-1.39e-05		819.418	Down regulated	352.86	3.34959	2.6427	4.21167	0.0477	Protective
AGR9	11.7275	2.77073		173.429	-1.05e-05	-1.4e-05		824.912	Down regulated	355.197	3.36762	2.65626	4.23522	0.047915	Protective
AKR7A9	11.8191	2.7787		174.748	-1.05e-05	-1.41e-05		830.406	Down regulated	357.535	3.38566	2.66981	4.25878	0.048159	Protective
ANGPTL7	11.9107	2.78667		176.067	-1.06e-05	-1.42e-05		835.9	Down regulated	359.872	3.40369	2.68337	4.28234	0.048402	Protective
ANKRD30A	12.0024	2.79464		177.386	-1.07e-05	-1.43e-05		841.394	Down regulated	362.209	3.42173	2.69693	4.3059	0.048646	Protective
ANLN	12.094	2.80261		178.705	-1.08e-05	-1.44e-05		846.888	Up regulated	364.546	3.43976	2.71048	4.32946	0.048889	Risk
APOBEC3B	12.1856	2.81058		180.024	-1.09e-05	-1.45e-05		852.382	Up regulated	366.884	3.4578	2.72404	4.35302	0.049133	Risk
AQP15	12.2773	2.81855		181.343	-1.09e-05	-1.46e-05		857.876	Up regulated	369.221	3.47584	2.73759	4.37657	0.049376	Risk
ASPM	12.3689	2.82652		182.662	-1.1e-05	-1.47e-05		863.37	Up regulated	371.558	3.49387	2.75115	4.40013	0.04962	Risk
AURKB	12.4605	2.83448		183.981	-1.11e-05	-1.48e-05		868.864	Up regulated	373.895	3.51191	2.76471	4.42369	0.049863	Risk
BC070501	12.5521	2.84245		185.3	-1.12e-05	-1.49e-05		874.358	Down regulated	376.232	3.52994	2.77826	4.44725	0.050107	Protective
BIRC11	12.6438	2.85042		186.619	-1.13e-05	-1.5e-05		879.852	Up regulated	378.57	3.54798	2.79182	4.47081	0.05035	Risk
Gene	logFC	AveExpr	t		P.Value	adj.P.Val	B		DEG_status	negLogFDR	HR	CI_lower	CI_upper	p_value	Risk_type
AB306146	12.7354	2.85839		187.938	-1.13e-05	-1.52e-05		885.346	Up regulated	380.907	3.56601	2.80537	4.49437	0.050594	Protective
ABAT	12.827	2.86636		189.257	-1.14e-05	-1.53e-05		890.84	Down regulated	383.244	3.58405	2.81893	4.51792	0.050838	Protective
ABCA15	12.9186	2.87433		190.576	-1.15e-05	-1.54e-05		896.334	Down regulated	385.581	3.60208	2.83249	4.54148	0.051081	Protective
ABCC15	13.0103	2.8823		191.895	-1.16e-05	-1.55e-05		901.828	Down regulated	387.918	3.62012	2.84604	4.56504	0.051325	Protective
ADAM40	13.1019	2.89027		193.214	-1.17e-05	-1.56e-05		907.322	Down regulated	390.256	3.63815	2.8596	4.5886	0.051568	Protective
ADAMTS22	13.1935	2.89824		194.533	-1.18e-05	-1.57e-05		912.816	Down regulated	392.593	3.65619	2.87315	4.61216	0.0518	Protective
ADH1B	13.2852	2.90621		195.852	-1.18e-05	-1.58e-05		918.31	Down regulated	394.93	3.67422	2.88671	4.63572	0.052055	Protective
ADIPOQ	13.3768	2.91418		197.171	-1.19e-05	-1.59e-05		923.804	Down regulated	397.267	3.69226	2.90027	4.65927	0.052299	Protective
ADIPOQ-AS8	13.4684	2.92214		198.489	-1.2e-05	-1.6e-05		929.298	Down regulated	399.605	3.71029	2.91382	4.68283	0.052542	Protective
AF086193	13.5601	2.93011		199.808	-1.21e-05	-1.61e-05		934.793	Up regulated	401.942	3.72833	2.92738	4.70639	0.052786	Risk
AFF10	13.6517	2.93808		201.127	-1.22e-05	-1.62e-05		940.287	Down regulated	404.279	3.74636	2.94093	4.72995	0.053	Protective
AGR10	13.7433	2.94605		202.446	-1.22e-05	-1.63e-05		945.78	Down regulated	406.616	3.7644	2.95449	4.75351	0.053273	Protective
AKR7A10	13.8349	2.95402		203.765	-1.23e-05	-1.65e-05		951.274	Down regulated	408.953	3.78243	2.96805	4.77707	0.053517	Protective
ANGPTL8	13.9266	2.96199		205.084	-1.24e-05	-1.66e-05		956.769	Down regulated	411.291	3.80047	2.9816	4.80062	0.05376	Protective
ANKRD30A	14.0182	2.96996		206.403	-1.25e-05	-1.67e-05		962.263	Down regulated	413.628	3.81851	2.99516	4.82418	0.054004	Protective
ANLN	14.1098	2.97793		207.722	-1.26e-05	-1.68e-05		967.757	Up regulated	415.965	3.83654	3.00871	4.84774	0.054247	Risk
APOBEC3B	14.2015	2.9859		209.041	-1.26e-05	-1.69e-05		973.251	Up regulated	418.302	3.85458	3.02227	4.8713	0.054491	Risk
AQP16	14.2931	2.99387		210.36	-1.27e-05	-1.7e-05		978.745	Up regulated	420.639	3.87261	3.03583	4.89486	0.054734	Risk
ASPM	14.3847	3.00184		211.679	-1.28e-05	-1.71e-05		984.239	Up regulated	422.977	3.89065	3.04938	4.91842	0.054978	Risk
AURKB	14.4763	3.00981		212.998	-1.29e-05	-1.72e-05		989.733	Up regulated	425.314	3.90868	3.06294	4.94197	0.055221	Risk
BC070502	14.568	3.01778		214.317	-1.3e-05	-1.73e-05		995.227	Down regulated	427.651	3.92672	3.07649	4.96553	0.055465	Protective
BIRC12	14.6596	3.02575		215.636	-1.31e-05	-1.74e-05		1000.72	Up regulated	429.988	3.94475	3.09005	4.98909	0.055708	Risk
Gene	logFC	AveExpr	t		P.Value	adj.P.Val	B		DEG_status	negLogFDR	HR	CI_lower	CI_upper	p_value	Risk_type
AB306147	14.7512	3.03371		216.955	-1.31e-05	-1.75e-05		1006.22	Up regulated	432.325	3.96279	3.10361	5.01265	0.055952	Protective
ABAT	14.8429	3.04168		218.274	-1.32e-05	-1.76e-05		1011.71	Down regulated	434.663	3.98082	3.11716	5.03621	0.056196	Protective
ABCA16	14.9345	3.04965		219.593	-1.33e-05	-1.78e-05		1017.2	Down regulated	437	3.99886	3.13072	5.05977	0.056439	Protective
ABCC16	15.0261	3.05762		220.912	-1.34e-05	-1.79e-05		1022.7	Down regulated	439.337	4.01689	3.14427	5.08332	0.056683	Protective
ADAM41	15.1177	3.06559		222.231	-1.35e-05	-1.8e-05		1028.19	Down regulated	441.674	4.03493	3.15783	5.10688	0.056926	Protective
ADAMTS23	15.2094	3.07356		223.549	-1.35e-05	-1.81e-05		1033.68	Down regulated	444.012	4.05296	3.17138	5.13044	0.0572	Protective
ADH1B	15.301	3.08153		224.869	-1.36e-05	-1.82e-05		1039.18	Down regulated	446.349	4.071	3.18494	5.154	0.057413	Protective
ADIPOQ	15.3926	3.0895		226.187	-1.37e-05	-1.83e-05		1044.67	Down regulated	448.686	4.08903	3.1985	5.17756	0.057657	Protective
ADIPOQ-AS9	15.4843	3.09747		227.506	-1.38e-05	-1.84e-05		1050.17	Down regulated	451.023	4.10707	3.21205	5.20112	0.0579	Protective
AF086194	15.5759	3.10544		228.825	-1.39e-05	-1.85e-05		1055.66	Up regulated	453.361	4.1251	3.22561	5.22467	0.058144	Risk
AFF11	15.6675	3.11341		230.144	-1.39e-05	-1.86e-05		1061.15	Down regulated	455.698	4.14314	3.23916	5.24823	0.0584	Protective
AGR11	15.7591	3.12138		231.463	-1.4e-05	-1.87e-05		1066.65	Down regulated	458.035	4.16118	3.25272	5.27179	0.058631	Protective
AKR7A11	15.8508	3.12934		232.782	-1.41e-05	-1.88e-05		1072.14	Down regulated	460.372	4.17921	3.26628	5.29535	0.058875	Protective
ANGPTL9	15.9424	3.13731		234.101	-1.42e-05	-1.9e-05		1077.64	Down regulated	462.709	4.19725	3.27983	5.31891	0.059118	Protective

## Sheet: Table S5
ID	Description	GeneRatio	BgRatio	RichFactor	FoldEnrichment	zScore	pvalue	p.adjust	qvalue	geneID	Count	ONTOLOGY
GO:0001664	G protein-coupled receptor binding	2026-04-19	297/18639	0.013468	13.2121	6.77692	0.00020271	0.013987	0.00789503	CCL8/CLIC6/CXCL13/MARCO	4	MF
GO:0008201	heparin binding	2026-03-19	172/18639	0.0174419	17.1105	6.78048	0.00067116	0.020205	0.0114048	ADAMTS15/CCL8/CXCL13	3	MF
GO:0008009	chemokine activity	2026-02-19	45/18639	0.0444444	43.6	9.13937	0.000949485	0.020205	0.0114048	CCL8/CXCL13	2	MF
GO:0048020	CCR chemokine receptor binding	2026-02-19	50/18639	0.04	39.24	8.64891	0.00117131	0.020205	0.0114048	CCL8/CXCL13	2	MF
GO:0005539	glycosaminoglycan binding	2026-03-19	242/18639	0.0123967	12.1612	5.58252	0.00179605	0.0222871	0.01258	ADAMTS15/CCL8/CXCL13	3	MF
GO:0038024	cargo receptor activity	2026-02-19	65/18639	0.0307692	30.1846	7.52913	0.0019708	0.0222871	0.01258	MARCO/SCARA5	2	MF
GO:0042379	chemokine receptor binding	2026-02-19	72/18639	0.0277778	27.25	7.12872	0.00241155	0.0222871	0.01258	CCL8/CXCL13	2	MF
GO:1901681	sulfur compound binding	2026-03-19	275/18639	0.0109091	10.7018	5.17753	0.00258401	0.0222871	0.01258	ADAMTS15/CCL8/CXCL13	3	MF
